**Data paper: FoRAGE (Functional Responses from Around the Globe in all Ecosystems) database: a compilation of functional responses for consumers and parasitoids**

**Stella F. Uiterwaal, Ian T. Lagerstrom, Shelby R. Lyon, John P. DeLong**

School of Biological Sciences, University of Nebraska – Lincoln, Lincoln, NE 68588 USA

**ABSTRACT**

Functional responses – the relationships between consumer foraging rate and resource (prey) density – provide key insights into consumer-resource interactions and predation mechanics while also being a major contributor to population dynamics and food web structure. We present a global database of standardized functional response parameters extracted from the published literature. We refit the functional responses with a Type II model using standardized methods and report the fitted parameters along with data on experimental conditions, consumer and resource taxonomy and type, as well as the habitat and dimensionality of the foraging interaction. The consumer and resource species covered here are taxonomically diverse, from protozoans filtering algae to wasps parasitizing moth larvae to wolves hunting moose. The FoRAGE database (doi:10.5063/F17H1GTQ) is a living data set that will be updated periodically as new functional responses are published.

**INTRODUCTION**

The strength of a consumer-resource interaction determines the importance of a given food web link (Novak and Wootton, 2010). Thus, interaction strength can give key insights into population dynamics and the structure and stability of food webs (Gilbert et al., 2014; McCann et al., 1998).

One way to measure consumer-resource interaction strength is through the functional response (Holling, 1959a). A consumer's functional response describes foraging rate as a function of resource availability. The simplest form is Type I, where foraging increases linearly with resource density. Most consumers, however, must pay a time cost for each resource item utilized, resulting in an asymptotic, Type II functional response. A common form of Type II functional response is the Holling disc equation:

$$f_{pc} = \frac{aR}{1+aRh} \quad \text{Equation 1.}$$

where  $f_{pc}$  is the per capita foraging rate of the consumer (number of resources per time per predator),  $a$  is the space clearance rate (space per time per predator),  $R$  is the initial resource density (resources per space), and  $h$  is handling time (time per resource) (Holling, 1959a). Space clearance rate describe how quickly a consumer can remove resources from a given space, while handling time describes the loss in search time associated with the consumption of an individual resource item. Handling time reflects any activity that prevents the consumer from searching for additional resources (prey items) after catching a resource. This may include transporting the resource to a safe location, chewing the resource, and any time spent digesting (if the consumer cannot continue hunting while digesting).

Here, we present standardized functional response parameters and the associated experimental conditions for over 2,000 consumer-resource combinations from the literature. The database will be periodically revised and updated with new functional responses as they are published. The data set is housed at the Knowledge Network for Biocomplexity (<https://knb.ecoinformatics.org/>) and can be found through its DOI: doi:10.5063/F17H1GTQ. The data set contains two files, one containing the overall data set of functional response parameters

and associated information (with ‘data set’ in the file name) and the other containing the raw foraging observations (with ‘original curves’ in the file name).

## **METHODS**

We searched the literature using terms such as “functional response”, “predator-prey interaction”, and “biocontrol” to find papers reporting predator and parasitoid functional responses. We also searched within references of papers that contained functional responses, through other compilations of functional responses (DeLong et al., 2015; DeLong and Vasseur, 2012a, 2012b, 2011; Kalinoski and DeLong, 2016; Rall et al., 2012; Uiterwaal and DeLong, 2018), and through the websites of researchers that had done multiple functional response papers. Our search produced 2,083 functional responses across a wide range of taxa from all habitats and biomes and from around the world. See Appendix A for sources. Each individual functional response curve received a unique ID number associated with its functional response data, consumer and resource traits, and experimental conditions. Multiple distinct curves – due to experimental treatments, age and/or sex, consumer and/or resource species, temperature, number of consumers, substrate, or other category – from the same paper received different IDs.

### **Functional response data**

#### **Data collection**

Due to discrepancies in terms of equations and techniques used to calculate functional responses across studies, species, and experimental approaches, we did not use the parameters reported in the original papers. Rather, we recorded original resource density and consumer foraging rate data as given in the paper. We preferentially recorded raw data in tables, but we digitized most data from figures. When raw data was not available, we recorded mean foraging rate at a given resource

density along with standard errors and sample size at that density. We converted error bars presented as 95% confidence intervals or standard deviation to standard error. In some cases where raw data was reported in figures, it was unclear how many actual observations were represented by a point on the graph. In these cases, we used the minimum possible number of replicates based on the reported sample size to obtain a conservative number of datapoints. If resource density was expressed in terms of carbon, protein, or chlorophyll concentration, we converted this to number of individuals using conversions provided in the paper (preferentially) or from outside sources. The data collection process is outlined in Figure 1. Additional functional response data can be included in the FoRAGE data set by making the corresponding author aware of a new source via email.

### Data fitting

We made all data comparable by standardizing resource density to units of resources per  $\text{cm}^2$  or  $\text{m}^2$  or resources per  $\text{cm}^3$  or  $\text{m}^3$  and foraging rate to units of number of resources eaten (or parasitized) per consumer per day. For 2.5-dimensional foragers (See “Experimental conditions” below), we rescaled prey density by raising it to the power of 2.5/2 if density was reported as an area and to the power of 2.5/3 if density was reported as a volume. In this way, the units of space clearance rate for organisms foraging in a fractal dimension between a plane and a volume are  $\text{m}^{2.5}$  per predator per day. However, the prey density data are retained in either two or three dimensional units within the ‘original curves’ file.

We generated 200 bootstrapped datasets per functional response. We used standard random sampling with replacement for data sets with raw data. For data sets that reported mean foraging rate at different densities, we generated simulated data sets with the same mean, standard error,

and sample size as the reported data set using the same bootstrapping procedure. Then, we fit foraging data to the Holling disc equation (Equation 1) if the resource was replenished by the experimenters as it was consumed throughout the experiment. Datasets from wild consumers were treated as having resources replenished. If resources were not replenished, we fit foraging data to the Roger's random predator equation:

$$f_{pc} = R - \frac{W(ahRe^{-a(t-hR)})}{ah} \quad \text{Equation 2.}$$

where  $f_{pc}$  is the per capita number of resources eaten by the consumer in the time of the foraging trial  $t$ ,  $W$  is the Lambert W function, and  $R$ ,  $a$ , and  $h$  are as in Equation 1. This equation accounts for resource depletion as the consumer forages (Bolker, 2008; Rogers, 1972). We used nonlinear ordinary least squares regression in Matlab to conduct these fits. To obtain parameter estimates and confidence intervals, we used the medians and 95% quantiles of the bootstrapped parameter distributions, respectively. We did not account for prey or predator population growth in the fitting procedure (Rosenbaum and Rall, 2018), although most experiments were conducted for periods precluding changes in prey or predator through reproduction.

When sample size was not given for data presented as means, we assumed conservatively that there were three replicates, the minimum number required to obtain a standard error. To estimate error when none was given or when error type was not specified, we used a Taylor power law relationship between the mean and the foraging rate variance across all observations in the data set for which this was available. We estimated this relationship using ordinary least squares regression with the log of the standard error as the dependent variable and the log of the mean foraging rate as the independent variable (Figure 2). The fitted exponent was 0.83 (0.006  $\pm$  SE) and the intercept was -1.76 ( $\pm$  0.028). When arena size was not given, we conducted the fits and reported the handling time in the standard units but space clearance rate with units of 'arenas per

predator per day'. If handling time was not different from zero (95% confidence intervals overlapped zero), the functional response was assumed to be Type I and handling time was removed.

### **Consumer and resource traits**

#### **Mass**

We recorded masses or lengths of consumer and resource species from the original papers if available. If size measurements were not available in the original paper, we used mass or length estimates from external sources. We converted lengths to masses using length-weight relationships (usually by order or family). When no species-level size estimates were available, we calculated size based on one or more closely related species (e.g., in the same genus). In some cases, we were unable to obtain sizes of juveniles. In these cases, we calculated juvenile:adult size ratios of a related organism for which we did have juvenile size data. We used this percentage to estimate the unknown juvenile size of the focal organism. When necessary, we used water content to calculate wet mass from dry mass. Because predators and parasitoids utilize live resources, wet mass provides a more accurate size estimate than dry mass for functional response experiments. We used volume estimates and the density of freshwater or saltwater to estimate masses of some aquatic organisms (e.g. single-celled algae). Our methods for recording consumer and resource masses are outlined in Figure 3.

#### **Other traits**

We recorded consumer and resource traits as reported in the paper, including developmental stage, sex, and interaction type (predation or parasitoidism). We also assigned each consumer and

resource to approximate taxonomic categories, including their level of cellularity (unicell or metazoan), vertebrate status (vertebrate, invertebrate, or protozoan), and other levels that represented major groupings of data such as ‘fish’ or ‘copepod’ or ‘dinoflagellate’.

### **Experimental conditions**

We recorded temperature or average temperature (if a range was given) at which experiments with ectotherms were conducted. If the consumer was an endotherm, we recorded body temperature. We also reported the number of consumers per arena and the length of time consumers were deprived of resources before the experiment. We recorded notes on other experimental variables such as habitat complexity or chemical pretreatment of organisms. We also identified field-determined functional responses as ones where consumers were foraging in natural field settings rather than in a laboratory.

We determined whether the functional response occurred in two-dimensional (e.g. wolf spiders in a petri dish), three-dimensional (e.g. copepods and *Daphnia* in a tank), or 2.5-dimensional (e.g. insects crawling on whole plants, spiders on webs) space. In cases where the consumer moved in three dimensions but the resource moved in two dimensions (e.g. fish consuming bottom-dwelling crayfish), we determined the interaction to be occurring in two dimensions.

### **ACKNOWLEDGEMENTS**

This work was supported by a James S. McDonnell Foundation Complex Systems Scholar Award to J.P.D., a Binational Science Foundation (BSF) grant (number 2014295), and a National Science Foundation Graduate Research Fellowship to S.F.U (DGE-1610400).

## **REFERENCES**

- Agarwala, B.K., Bardhanroy, P., Yasuda, H., Takizawa, T., 2001. Prey Consumption and Oviposition of the Aphidophagous Predator *Menochilus sexmaculatus* (Coleoptera: Coccinellidae) in Relation to Prey Density and Adult Size. *Environ Entomol* 30, 1182–1187. <https://doi.org/10.1603/0046-225X-30.6.1182>
- Akre, B.G., Johnson, D.M., 1979. Switching and Sigmoid Functional Response Curves by Damselfly Naiads with Alternative Prey Available. *Journal of Animal Ecology* 48, 703–720. <https://doi.org/10.2307/4191>
- Alanis, J.G., Sarma, S.S.S., Nandini, S., 2009. Prey selectivity and functional response by larval red-eyed tetra *Moenkhausia sanctaefilomenae* (Steindachner, 1907) (Characiformes: Characidae). *Brazilian Archives of Biology and Technology* 52, 1209–1216. <https://doi.org/10.1590/S1516-89132009000500019>
- Alexander, M.E., Dick, J.T.A., O'Connor, N.E., 2013a. Born to kill: Predatory functional responses of the littoral amphipod *Echinogammarus marinus* Leach throughout its life history. *Journal of Experimental Marine Biology and Ecology* 439, 92–99. <https://doi.org/10.1016/j.jembe.2012.10.006>
- Alexander, M.E., Dick, J.T.A., O'Connor, N.E., 2013b. Trait-mediated indirect interactions in a marine intertidal system as quantified by functional responses. *Oikos* 122, 1521–1531. <https://doi.org/10.1111/j.1600-0706.2013.00472.x>
- Alexander, M.E., Dick, J.T.A., O'Connor, N.E., Haddaway, N.R., Farnsworth, K.D., 2012. Functional responses of the intertidal amphipod *Echinogammarus marinus*: effects of prey supply, model selection and habitat complexity. *Marine Ecology Progress Series* 468, 191–202. <https://doi.org/10.3354/meps09978>
- Alexander, M.E., Dick, J.T.A., Weyl, O.L.F., Robinson, T.B., Richardson, D.M., 2014. Existing and emerging high impact invasive species are characterized by higher functional responses than natives. *Biol Lett* 10. <https://doi.org/10.1098/rsbl.2013.0946>
- Alexander, M.E., Kaiser, H., Weyl, O.L.F., Dick, J.T.A., 2015. Habitat simplification increases the impact of a freshwater invasive fish. *Environ Biol Fish* 98, 477–486. <https://doi.org/10.1007/s10641-014-0278-z>
- Aljetlawi, A.A., Sparrevik, E., Leonardsson, K., 2004. Prey–predator size-dependent functional response: derivation and rescaling to the real world. *Journal of Animal Ecology* 73, 239–252. <https://doi.org/10.1111/j.0021-8790.2004.00800.x>
- Almeda, R., Augustin, C.B., Alcaraz, M., Calbet, A., Saiz, E., 2010. Feeding rates and gross growth efficiencies of larval developmental stages of *Oithona davisae* (Copepoda, Cyclopoida). *Journal of Experimental Marine Biology and Ecology* 387, 24–35. <https://doi.org/10.1016/j.jembe.2010.03.002>
- Anderson, R.M., Whitfield, P.J., Dobson, A.P., Keymer, A.E., 1978. Concomitant Predation and Infection Processes: An Experimental Study. *Journal of Animal Ecology* 47, 891–911. <https://doi.org/10.2307/3677>
- Anderson, T.L., 2016. Predation risk between cannibalistic aeshnid dragonflies influences their functional response on a larval salamander prey. *Journal of Zoology* 300, 221–227. <https://doi.org/10.1111/jzo.12376>
- Anderson, T.L., Linares, C., Dodson, K.N., Semlitsch, R.D., 2016. Variability in functional response curves among larval salamanders: comparisons across species and size classes. *Canadian Journal of Zoology* 94, 23–30. <https://doi.org/10.1139/cjz-2015-0149>
- Anderson, T.W., 2001. Predator Responses, Prey Refuges, and Density-Dependent Mortality of a Marine Fish. *Ecology* 82, 245–257. [https://doi.org/10.1890/0012-9658\(2001\)082\[0245:PRPRAD\]2.0.CO;2](https://doi.org/10.1890/0012-9658(2001)082[0245:PRPRAD]2.0.CO;2)



- Andresen, H., van der Meer, J., 2010. Brown shrimp (*Crangon crangon*, L.) functional response to density of different sized juvenile bivalves *Macoma balthica* (L.). *Journal of Experimental Marine Biology and Ecology* 390, 31–38. <https://doi.org/10.1016/j.jembe.2010.04.027>
- Asante, S.K., 1995. Functional Responses of the European Earwig and Two Species of Coccinellids to Densities of *Eriosoma lanigerum* (Hausmann) (Hemiptera: Aphididae). *Australian Journal of Entomology* 34, 105–109. <https://doi.org/10.1111/j.1440-6055.1995.tb01295.x>
- Atlihan, R., Kaydan, M.B., Yarimbatman, A., Okut, H., 2010. Functional response of the coccinellid predator *Adalia fasciatopunctata revelierei* to walnut aphid (*Callaphis juglandis*) | SpringerLink. *Phytoparasitica* 38, 23–29.
- Badii, M.H., Hernández-Ortiz, E., Flores, A.E., Landeros, J., 2004. Prey stage preference and functional response of *Euseius hibisci* to *Tetranychus urticae* (Acari: Phytoseiidae, Tetranychidae). *Exp. Appl. Acarol.* 34, 263–273.
- Bailey, K.M., Batty, R.S., 1983. A laboratory study of predation by *Aurelia aurita* on larval herring (*Clupea harengus*): Experimental observations compared with model predictions. *Marine Biology* 72, 295–301. <https://doi.org/10.1007/BF00396835>
- Bailey, P.C.E., 1989. The effect of water temperature on the functional response of the water stick insect *Ranatra dispar* (Heteroptera: Nepidae). *Australian Journal of Ecology* 14, 381–386. <https://doi.org/10.1111/j.1442-9993.1989.tb01448.x>
- Ball, S.L., Woodcock, B.A., Potts, S.G., Heard, M.S., 2015. Size matters: Body size determines functional responses of ground beetle interactions. *Basic and Applied Ecology* 16, 621–628. <https://doi.org/10.1016/j.baae.2015.06.001>
- Båmstedt, U., 1998. Trophodynamics of *Pleurobrachia pileus* (Ctenophora, Cydippida) and ctenophore summer occurrence off the Norwegian North-West coast. *Sarsia* 83, 169–181. <https://doi.org/10.1080/00364827.1998.10413680>
- Båmstedt, U., 1990. Trophodynamics of the scyphomedusae *Aurelia aurita*. Predation rate in relation to abundance, size and type of prey organism. *J Plankton Res* 12, 215–229. <https://doi.org/10.1093/plankt/12.1.215>
- Båmstedt, U., Martinussen, M.B., Matsakis, S., 1994. Trophodynamics of the two scyphozoan jellyfishes, *Aurelia aurita* and *Cyanea capillata*, in western Norway. *ICES J Mar Sci* 51, 369–382. <https://doi.org/10.1006/jmsc.1994.1039>
- Barbosa, P.R.R., Oliveira, M.D., Giorgi, J.A., Silva-Torres, C.S.A., Torres, J.B., 2014. Predatory Behavior and Life History of *Tenuisvalvae notata* (Coleoptera: Coccinellidae) Under Variable Prey Availability Conditions. *Florida Entomologist* 97, 1026–1034. <https://doi.org/10.1653/024.097.0304>
- Barnhisel, D.R., Kerfoot, W.C., 2004. Fitting into Food Webs: Behavioral and Functional Response of Young Lake Trout (*Salvelinus namaycush*) to an Introduced Prey, the Spiny Cladoceran (*Bythotrephes cederstroemi*). *Journal of Great Lakes Research* 30, 300–314. [https://doi.org/10.1016/S0380-1330\(04\)70393-7](https://doi.org/10.1016/S0380-1330(04)70393-7)
- Barrios-O'Neill, D., Dick, J.T.A., Emmerson, M.C., Ricciardi, A., MacIsaac, H.J., Alexander, M.E., Bovy, H.C., 2014. Fortune favours the bold: a higher predator reduces the impact of a native but not an invasive intermediate predator. *Journal of Animal Ecology* 83, 693–701. <https://doi.org/10.1111/1365-2656.12155>
- Beier, S., Bolley, M., Traunspurger, W., 2004. Predator–prey interactions between *Dugesia gonocephala* and free-living nematodes. *Freshwater Biology* 49, 77–86. <https://doi.org/10.1046/j.1365-2426.2003.01168.x>
- Bergman, E., 1988. Foraging Abilities and Niche Breadths of Two Percids, *Perca fluviatilis* and *Gymnocephalus cernua*, Under Different Environmental Conditions. *Journal of Animal Ecology* 57, 443–453. <https://doi.org/10.2307/4916>

- Bergman, E., 1987. Temperature-dependent differences in foraging ability of two percids, *Perca fluviatilis* and *Gymnocephalus cernuus*. *Environ Biol Fish* 19, 45–53.  
<https://doi.org/10.1007/BF00002736>
- Bergström, U., Englund, G., 2004. Spatial scale, heterogeneity and functional responses. *Journal of Animal Ecology* 73, 487–493. <https://doi.org/10.1111/j.0021-8790.2004.00823.x>
- Bolker, B.M., 2008. *Ecological Models and Data in R*. Princeton University Press.
- Bollache, L., Dick, J.T., Farnsworth, K.D., Montgomery, W.I., 2008. Comparison of the functional responses of invasive and native amphipods. *Biol Lett* 4, 166–169.  
<https://doi.org/10.1098/rsbl.2007.0554>
- Bovy, H.C., Barrios-O'Neill, D., Emmerson, M.C., Aldridge, D.C., Dick, J.T.A., 2015. Predicting the predatory impacts of the “demon shrimp” *Dikerogammarus haemobaphes*, on native and previously introduced species. *Biol Invasions* 17, 597–607. <https://doi.org/10.1007/s10530-014-0751-9>
- Brandl, Z., 1998. Feeding strategies of planktonic cyclopoids in lacustrine ecosystems. *Journal of Marine Systems* 15, 87–95. [https://doi.org/10.1016/S0924-7963\(97\)00042-0](https://doi.org/10.1016/S0924-7963(97)00042-0)
- Bressendorff, B.B., Toft, S., 2011. Dome-shaped functional response induced by nutrient imbalance of the prey. *Biol Lett* 7, 517–520. <https://doi.org/10.1098/rsbl.2011.0103>
- Bryan, M.D., Atchison, G.J., Sandheinrich, M.B., 1995. Effects of cadmium on the foraging behavior and growth of juvenile bluegill, *Lepomis macrochirus*. *Can. J. Fish. Aquat. Sci.* 52, 1630–1638.  
<https://doi.org/10.1139/f95-757>
- Buckel, J.A., Stoner, A.W., 2000. Functional response and switching behavior of young-of-the-year piscivorous bluefish. *Journal of Experimental Marine Biology and Ecology* 245, 25–41.  
[https://doi.org/10.1016/S0022-0981\(99\)00155-0](https://doi.org/10.1016/S0022-0981(99)00155-0)
- Buecher, E., Gasser, B., 1998. Estimation of predatory impact of *Pleurobrachia rhodopsis* (cydippid ctenophore) in the northwestern Mediterranean Sea: in situ observations and laboratory experiments. *J Plankton Res* 20, 631–651. <https://doi.org/10.1093/plankt/20.4.631>
- Burns, C.W., Rigler, F.H., 1967. Comparison of Filtering Rates of *Daphnia Rosea* in Lake Water and in Suspensions of Yeast. *Limnology and Oceanography* 12, 492–502.  
<https://doi.org/10.4319/lo.1967.12.3.0492>
- Buskey, E.J., Coulter, C.J., Brown, S.L., 1994. Feeding, growth and bioluminescence of the heterotrophic dinoflagellate *Protoperidinium huberi*. *Marine Biology* 121, 373–380.  
<https://doi.org/10.1007/BF00346747>
- Cabral, S., Soares, A.O., Garcia, P., 2009. Predation by *Coccinella undecimpunctata* L. (Coleoptera: Coccinellidae) on *Myzuspersicae* Sulzer (Homoptera: Aphididae): Effect of prey density. *Biological Control* 50, 25–29. <https://doi.org/10.1016/j.biocontrol.2009.01.020>
- Carrillo, D., Peña, J.E., 2012. Prey-stage preferences and functional and numerical responses of *Amblyseius largoensis* (Acari: Phytoseiidae) to *Raoiella indica* (Acari: Tenuipalpidae). *Exp Appl Acarol* 57, 361–372. <https://doi.org/10.1007/s10493-011-9488-7>
- Castagnoli, M., Simoni, S., 1999. Effect of long-term feeding history on functional and numerical response of *Neoseiulus californicus* (Acari: Phytoseiidae). *Exp Appl Acarol* 23, 217–234.  
<https://doi.org/10.1023/A:1006066930638>
- Cédola, C.V., Sánchez, N.E., Liljesthrom, G.G., 2001. Effect of Tomato Leaf Hairiness on Functional and Numerical Response of *Neoseiulus Californicus* (Acari: Phytoseiidae). *Exp Appl Acarol* 25, 819–831. <https://doi.org/10.1023/A:1020499624661>
- Chang, K.-S., Morimoto, N., Nakasuji, F., 1993. The functional response of a coccinellid beetle *Aiolocaria hexaspilota* to its prey, the Walnut Leaf Beetle *Gastrolina depressa*. *Chinese Journal of Entomology* 13, 187–193.

- Chant, D.A., 1961. The Effect of Prey Density on Prey Consumption and Oviposition in Adults of *Typhlodromus* (t.) *occidentalis* Nesbitt (acarina: Phytoseiidae) in the Laboratory. *Can. J. Zool.* 39, 311–315. <https://doi.org/10.1139/z61-035>
- Chenau, B., Costamagna, A.C., Bianchi, F.J.J.A., Schellhorn, N.A., 2011. Functional response of two common Australian predators, *Dicranolaius bellulus* (Guérin-Méneville) (Coleoptera: Melyridae) and *Micraspis frenata* (Erichson) (Coleoptera: Coccinellidae), attacking *Aphis gossypii* Glover (Hemiptera: Aphididae). *Australian Journal of Entomology* 50, 453–459. <https://doi.org/10.1111/j.1440-6055.2011.00830.x>
- Chesson, J., 1989. The Effect of Alternative Prey on the Functional Response of *Notonecta hoffmani*. *Ecology* 70, 1227–1235. <https://doi.org/10.2307/1938180>
- Chigbu, P., Sibley, T.H., 1994. Predation by *Neomysis mercedis*: effects of temperature, *Daphnia magna* size and prey density on ingestion rate and size selectivity. *Freshwater Biology* 32, 39–48. <https://doi.org/10.1111/j.1365-2427.1994.tb00864.x>
- Chong, J.-H., Oetting, R.D., 2006. Functional response and progeny production of the Madeira mealybug parasitoid, *Anagyrus* sp. nov. nr. *sinope*: The effects of host and parasitoid densities. *Biological Control* 39, 320–328. <https://doi.org/10.1016/j.biocontrol.2006.08.013>
- Chow, T., Long, G.E., Tamaki, G., 1983. Effects of Temperature and Hunger on the Functional Response of *Geocoris bullatus* (Say) (Hemiptera: Lygaeidae) to *Lygus* spp. (Hemiptera: Miridae) Density. *Environ Entomol* 12, 1332–1338. <https://doi.org/10.1093/ee/12.5.1332>
- Claver, M.A., Ravichandran, B., Khan, M.M., Ambrose, D.P., 2003. Impact of cypermethrin on the functional response, predatory and mating behaviour of a non-target potential biological control agent *Acanthaspis pedestris* (Stål) (Het., Reduviidae). *Journal of Applied Entomology* 127, 18–22. <https://doi.org/10.1046/j.1439-0418.2003.00654.x>
- Colin, S.P., Dam, H.G., 2007. Comparison of the functional and numerical responses of resistant versus non-resistant populations of the copepod *Acartia hudsonica* fed the toxic dinoflagellate *Alexandrium tamarensis*. *Harmful Algae* 6, 875–882. <https://doi.org/10.1016/j.hal.2007.05.003>
- Coll, M., Ridgway, R.L., 1995. Functional and Numerical Responses of *Orius insidiosus* (Heteroptera: Anthrenidae) to Its Prey in Different Vegetable Crops. *Ann Entomol Soc Am* 88, 732–738. <https://doi.org/10.1093/aesa/88.6.732>
- Confer, J.L., 1971. Intra-zooplankton Predation by *Mesocyclops edax* at Natural Prey Densities. *Limnology and Oceanography* 16, 663–666. <https://doi.org/10.4319/lo.1971.16.4.0663>
- Cothran, M.L., Thorp, J.H., 1985. Tests of Preference and Switching Behavior of the Dragonfly *Celithemis fasciata*. *Oikos* 44, 350–355. <https://doi.org/10.2307/3544710>
- Cowan, Z.-L., Dworjanyn, S.A., Caballes, C.F., Pratchett, M.S., 2016. Predation on crown-of-thorns starfish larvae by damselfishes. *Coral Reefs* 35, 1253–1262. <https://doi.org/10.1007/s00338-016-1491-3>
- Crowley, P.H., Martin, E.K., 1989. Functional Responses and Interference within and between Year Classes of a Dragonfly Population. *Journal of the North American Benthological Society* 8, 211–221. <https://doi.org/10.2307/1467324>
- Czesny, S., Dabrowski, K., Frankiewicz, P., 2001. Foraging patterns of juvenile walleye (*Stizostedion vitreum*) in a system consisting of a single predator and two prey species: testing model predictions. *Can. J. Zool.* 79, 1394–1400. <https://doi.org/10.1139/z01-087>
- Dale, B.W., Adams, L.G., Bowyer, R.T., 1994. Functional response of wolves preying on barren-ground caribou in a multiple-prey ecosystem. *Journal of Animal Ecology* 63, 9. <https://doi.org/10.2307/5230>
- Daly, B., Long, W.C., 2014. Inter-Cohort Cannibalism of Early Benthic Phase Blue King Crabs (*Paralithodes platypus*): Alternate Foraging Strategies in Different Habitats Lead to Different Functional Responses. *PLOS ONE* 9, e88694. <https://doi.org/10.1371/journal.pone.0088694>

- De Clercq, P., Merlevede, F., Mestdagh, I., Vandendurpel, K., Mohaghegh, J., Degheele, D., 1998. Predation on the tomato looper *Chrysodeixis chalcites* (Esper) (Lep., Noctuidae) by *Podisus maculiventris* (Say) and *Podisus nigrispinus* (Dallas) (Het., Pentatomidae). *Journal of Applied Entomology* 122, 93–98. <https://doi.org/10.1111/j.1439-0418.1998.tb01468.x>
- De Clercq, P., Mohaghegh, J., Tirry, L., 2000. Effect of Host Plant on the Functional Response of the Predator *Podisus nigrispinus* (Heteroptera: Pentatomidae). *Biological Control* 18, 65–70. <https://doi.org/10.1006/bcon.1999.0808>
- de Figueiredo, G.M., Nash, R.D.M., Montagnes, D.J.S., 2007. Do protozoa contribute significantly to the diet of larval fish in the Irish Sea? *Journal of the Marine Biological Association of the United Kingdom* 87, 843–850. <https://doi.org/10.1017/S002531540705713X>
- de Villemereuil, P.B., López-Sepulcre, A., 2011. Consumer functional responses under intra- and inter-specific interference competition. *Ecological Modelling* 222, 419–426. <https://doi.org/10.1016/j.ecolmodel.2010.10.011>
- DeBlois, E.M., Leggett, W.C., 1991. Functional response and potential impact of invertebrate predators on benthic fish eggs: analysis of the *Calliopius laeviusculus*-capelin (*Mallotus villosus*) predator-prey system. *Marine Ecology Progress Series* 69, 205–216.
- DeLong, J.P., Gilbert, B., Shurin, J.B., Savage, V.M., Barton, B.T., Clements, C.F., Dell, A.I., Greig, H.S., Harley, C.D.G., Kratina, P., McCann, K.S., Tunney, T.D., Vasseur, D.A., O'Connor, M.I., 2015. The body size dependence of trophic cascades. *Am. Nat.* 185, 354–366. <https://doi.org/10.1086/679735>
- DeLong, J.P., Vasseur, D.A., 2012a. A dynamic explanation of size–density scaling in carnivores. *Ecology* 93, 470–476. <https://doi.org/10.1890/11-1138.1>
- DeLong, J.P., Vasseur, D.A., 2012b. Size-density scaling in protists and the links between consumer–resource interaction parameters. *J Anim Ecol* 81, 1193–1201. <https://doi.org/10.1111/j.1365-2656.2012.02013.x>
- DeLong, J.P., Vasseur, D.A., 2011. Mutual interference is common and mostly intermediate in magnitude. *BMC Ecology* 11, 1. <https://doi.org/10.1186/1472-6785-11-1>
- DeMott, W.R., 1982. Feeding selectivities and relative ingestion rates of *Daphnia* and *Bosmina*. *Limnology and Oceanography* 27, 518–527. <https://doi.org/10.4319/lo.1982.27.3.0518>
- Denno, R.F., Gratton, C., Döbel, H., Finke, D.L., 2003. Predation Risk Affects Relative Strength of Top-down and Bottom-up Impacts on Insect Herbivores. *Ecology* 84, 1032–1044. [https://doi.org/10.1890/0012-9658\(2003\)084\[1032:PRARSO\]2.0.CO;2](https://doi.org/10.1890/0012-9658(2003)084[1032:PRARSO]2.0.CO;2)
- Denno, R.F., Mitter, M.S., Langellotto, G.A., Gratton, C., Finke, D.L., 2004. Interactions between a hunting spider and a web-builder: consequences of intraguild predation and cannibalism for prey suppression. *Ecological Entomology* 29, 566–577. <https://doi.org/10.1111/j.0307-6946.2004.00628.x>
- Dick, J.T.A., Gallagher, K., Avlijas, S., Clarke, H.C., Lewis, S.E., Leung, S., Minchin, D., Caffrey, J., Alexander, M.E., Maguire, C., Harrod, C., Reid, N., Haddaway, N.R., Farnsworth, K.D., Penk, M., Ricciardi, A., 2013. Ecological impacts of an invasive predator explained and predicted by comparative functional responses. *Biol Invasions* 15, 837–846. <https://doi.org/10.1007/s10530-012-0332-8>
- Ding-Xu, L., Juan, T., Zuo-Rui, S., 2007. Functional response of the predator *Scolothrips takahashii* to hawthorn spider mite, *Tetranychus viennensis*: effect of age and temperature. *Biocontrol* 52, 41. <https://doi.org/10.1007/s10526-006-9015-7>
- Dinis, A.M., Pereira, J.A., Benhadi-Marín, J., Santos, S. a. P., 2016. Feeding preferences and functional responses of *Calathus granatensis* and *Pterostichus globosus* (Coleoptera: Carabidae) on pupae of *Bactrocera oleae* (Diptera: Tephritidae). *Bulletin of Entomological Research* 106, 701–709. <https://doi.org/10.1017/S0007485316000213>

- Donnelly, B.E., Phillips, T.W., 2001. Functional Response of *Xylocoris flavipes* (Hemiptera: Anthocoridae) - Effects of Prey Species and Habitat. *Environ Entomol* 30, 617–624. <https://doi.org/10.1603/0046-225X-30.3.617>
- Dor, A., Valle-Mora, J., Rodríguez-Rodríguez, S.E., Liedo, P., 2014. Predation of *Anastrepha ludens* (Diptera: Tephritidae) by *Norops serranoi* (Reptilia: Polychrotidae): Functional Response and Evasion Ability. *Environ Entomol* 43, 706–715. <https://doi.org/10.1603/EN13281>
- Dumont, H.J., Ali, A.J., Sarma, S.S.S., Mertens, J., 1994. Predatory Filter-Feeding in Fairy Shrimps: Functional Response of *Streptocephalus proboscideus* (Crustacea: Anostraca) Fed *Anuraeopsis fissa* (Rotifera). *Internationale Revue der gesamten Hydrobiologie und Hydrographie* 79, 511–519. <https://doi.org/10.1002/iroh.19940790403>
- Eggleston, D., Lipcius, R., Hines, A., 1992. Density-dependent predation by blue crabs upon infaunal clam species with contrasting distribution and abundance patterns. *Marine Ecology Progress Series* 85, 55–68. <https://doi.org/10.3354/meps085055>
- Eggleston, D.B., 1990a. Behavioural Mechanisms Underlying Variable Functional Responses of Blue Crabs, *Callinectes sapidus* Feeding on Juvenile Oysters, *Crassostrea virginica*. *Journal of Animal Ecology* 59, 615–630. <https://doi.org/10.2307/4884>
- Eggleston, D.B., 1990b. Functional responses of blue crabs *Callinectes sapidus* Rathbun feeding on juvenile oysters *Crassostrea virginica* (Gmelin): effects of predator sex and size, and prey size. *Journal of Experimental Marine Biology and Ecology* 143, 73–90. [https://doi.org/10.1016/0022-0981\(90\)90112-P](https://doi.org/10.1016/0022-0981(90)90112-P)
- Eggleston, D.B., 1990c. Foraging Behavior of the Blue Crab, *Callinectes sapidus*, on Juvenile Oysters, *Crassostrea virginica*: Effects of Prey Density and Size. *Bulletin of Marine Science* 46, 62–82.
- El-Basha, N.A., Salman, M.S., Osman, M.A., 2012. Functional Response of *Orius albidipennis* (Hemiptera: Anthocoridae) to the Two-Spotted Spider Mite *Tetranychus urticae* (Acari: Tetranychidae). *Journal of Entomology* 9, 248–256.
- Elliott, J.M., 2003. A comparative study of the functional response of four species of carnivorous stoneflies. *Freshwater Biology* 48, 191–202. <https://doi.org/10.1046/j.1365-2427.2003.00982.x>
- Englund, G., Harms, S., 2001. The functional response of a predatory plant preying on swarming zooplankton. *Oikos* 94, 175–181. <https://doi.org/10.1034/j.1600-0706.2001.11199.x>
- Enkegaard, A., Brødsgaard, H.F., Hansen, D.L., 2001. *Macrolophus caliginosus*: Functional response to whiteflies and preference and switching capacity between whiteflies and spider mites. *Entomologia Experimentalis et Applicata* 101, 81–88. <https://doi.org/10.1046/j.1570-7458.2001.00893.x>
- Enriquez-Garcia, C., Nandini, S., Sarma, S.S.S., 2013. Feeding behaviour of *Acanthocyclops americanus* (Marsh) (Copepoda: Cyclopoida),. *Journal of Natural History* 47, 853–862.
- Everson, P., 1979. The functional response of *Phytoseiulus persimilis* (Acarina: Phytoseiidae) to various densities of *Tetranychus urticae* (Acarina: Tetranychidae). *The Canadian Entomologist* 111, 7–10. <https://doi.org/10.4039/Ent1117-1>
- Fan, Y., Pettitt, F.L., 1994. Functional response of *Neoseiulus barkeri* Hughes on two-spotted spider mite (Acari: Tetranychidae). *Exp Appl Acarol* 18, 613–621. <https://doi.org/10.1007/BF00051724>
- Fantinou, A.A., Baxevani, A., Drizou, F., Labropoulos, P., Perdakis, D., Papadoulis, G., 2012. Consumption rate, functional response and preference of the predaceous mite *Iphiseius degenerans* to *Tetranychus urticae* and *Eutetranychus orientalis*. *Exp Appl Acarol* 58, 133–144. <https://doi.org/10.1007/s10493-012-9557-6>
- Farahani, H.K., Goldansaz, S.H., 2013. Is host age an important factor in the bionomics of *Apanteles myeloenta* (Hymenoptera: Braconidae)? *EJE* 110, 277–283. <https://doi.org/10.14411/eje.2013.041>

- Farazmand, A., Fathipour, Y., Kamali, K., 2012. Functional response and mutual interference of *Neoseiulus californicus* and *Typhlodromus bagdasarjani* (Acari: Phytoseiidae) on *Tetranychus urticae* (Acari: Tetranychidae). *International Journal of Acarology* 38, 369–376. <https://doi.org/10.1080/01647954.2012.655310>
- Farhadi, R., Allahyari, H., Juliano, S.A., 2010. Functional Response of Larval and Adult Stages of *Hippodamia variegata* (Coleoptera: Coccinellidae) to Different Densities of *Aphis fabae* (Hemiptera: Aphididae). *Environ Entomol* 39, 1586–1592. <https://doi.org/10.1603/EN09285>
- Faria, L.D.B., Trinca, L.A., Godoy, W.A.C., 2004. Cannibalistic Behavior and Functional Response in *Chrysomya albiceps* (Diptera: Calliphoridae). *Journal of Insect Behavior* 17, 251–261. <https://doi.org/10.1023/B:JOIR.0000028574.91062.18>
- Farrokhi, S., Ashouri, A., Shirazi, J., Allahyari, H., Huigens, M.E., 2010. A comparative study on the functional response of *Wolbachia*-infected and uninfected forms of the parasitoid wasp *Trichogramma brassicae*. *J Insect Sci* 10. <https://doi.org/10.1673/031.010.14127>
- Ferla, N.J., Marchetti, M., Johann, L., Haetinger, C., 2011. Functional response of *Phytoseiulus macropilis* under different *Tetranychus urticae* (Acari: Phytoseiidae, Tetranychidae) population density in laboratory. *Zoologia* 28.
- Fernando, M.H.J.P., Hassell, M.P., 1980. Predator-prey responses in an acarine system. *Res Popul Ecol* 22, 301–322. <https://doi.org/10.1007/BF02530853>
- Finke, D.L., Denno, R.F., 2002. Intraguild Predation Diminished in Complex-Structured Vegetation: Implications for Prey Suppression. *Ecology* 83, 643–652. [https://doi.org/10.1890/0012-9658\(2002\)083\[0643:IPDICS\]2.0.CO;2](https://doi.org/10.1890/0012-9658(2002)083[0643:IPDICS]2.0.CO;2)
- Fitzsimons, J., Williston, B., Williston, G., Bravener, G., Jonas, J.L., Claramunt, R.M., Marsden, J.E., Ellrott, B.J., 2006. Laboratory Estimates of Salmonine Egg Predation by Round Gobies (*Neogobius melanostomus*), Sculpins (*Cottus cognatus* and *C. bairdi*), and Crayfish (*Orconectes propinquus*). *Journal of Great Lakes Research* 32, 227–241. [https://doi.org/10.3394/0380-1330\(2006\)32\[227:LEOSEP\]2.0.CO;2](https://doi.org/10.3394/0380-1330(2006)32[227:LEOSEP]2.0.CO;2)
- Flinn, P.W., 1991. Temperature-Dependent Functional Response of the Parasitoid *Cephalonomia waterstoni* (Gahan) (Hymenoptera: Bethyilidae) Attacking Rusty Grain Beetle Larvae (Coleoptera: Cucujidae). *Environ Entomol* 20, 872–876. <https://doi.org/10.1093/ee/20.3.872>
- Foglar, H., Malausa, J.C., Wajnberg, E., 1990. The functional response and preference of *Macrolophus caliginosus* [Heteroptera: Miridae] for two of its prey: *Myzus persicae* and *Tetranychus urticae*. *Entomophaga* 35, 465–474. <https://doi.org/10.1007/BF02375272>
- Folsom, T.C., Collins, N.C., 1984. The Diet and Foraging Behavior of the Larval Dragonfly *Anax junius* (Aeshnidae), with an Assessment of the Role of Refuges and Prey Activity. *Oikos* 42, 105–113. <https://doi.org/10.2307/3544615>
- Fox, L.R., Murdoch, W.W., 1978. Effects of Feeding History on Short-Term and Long-Term Functional Responses in *Notonecta hoffmanni*. *Journal of Animal Ecology* 47, 945–959. <https://doi.org/10.2307/3680>
- Frangópulos, M., Spyarakos, E., Guisande, C., 2011. Ingestion and clearance rates of the red *Noctiluca scintillans* fed on the toxic dinoflagellate *Alexandrium minutum* (Halim). *Harmful Algae* 10, 304–309. <https://doi.org/10.1016/j.hal.2010.11.002>
- Frewin, A.J., Xue, Y., Welsman, J.A., Broadbent, B.A., Schaafsma, A.W., Hallett, R.H., 2010. Development and Parasitism by *Aphelinus certus* (Hymenoptera: Aphelinidae), a Parasitoid of *Aphis glycines* (Hemiptera: Aphididae). *Environ Entomol* 39, 1570–1578. <https://doi.org/10.1603/EN09312>
- Fritz, H., Durant, D., Guillemain, M., 2001. Shape and sources of variations of the functional response of wildfowl: an experiment with mallards, *Anas platyrhynchos*. *Oikos* 93, 488–496. <https://doi.org/10.1034/j.1600-0706.2001.930314.x>

- Frost, B.W., 1972. Effects of Size and Concentration of Food Particles on the Feeding Behavior of the Marine Planktonic Copepod *Calanus pacificus*. *Limnology and Oceanography* 17, 805–815. <https://doi.org/10.4319/lo.1972.17.6.0805>
- Galarowicz, T.L., Wahl, D.H., 2005. Foraging by a young-of-the-year piscivore: the role of predator size, prey type, and density. *Can. J. Fish. Aquat. Sci.* 62, 2330–2342. <https://doi.org/10.1139/f05-148>
- Garrido, S., Cruz, J., Santos, A.M.P., Ré, P., Saiz, E., 2013. Effects of temperature, food type and food concentration on the grazing of the calanoid copepod *Centropages chierchiae*. *Journal of Plankton Research* 35, 843–854. <https://doi.org/10.1093/plankt/fbt037>
- Geange, S.W., Stier, A.C., 2010. Charismatic microfauna alter cyanobacterial production through a trophic cascade. *Coral Reefs* 29, 393–397. <https://doi.org/10.1007/s00338-010-0606-5>
- Gergs, A., Hoeltzenbein, N.I., Ratte, H.T., 2010. Diurnal and nocturnal functional response of juvenile *Notonecta maculata* considered as a consequence of shifting predation behaviour. *Behavioural Processes* 85, 151–156. <https://doi.org/10.1016/j.beproc.2010.07.006>
- Gergs, A., Ratte, H.T., 2009. Predicting functional response and size selectivity of juvenile *Notonecta maculata* foraging on *Daphnia magna*. *Ecological Modelling* 220, 3331–3341. <https://doi.org/10.1016/j.ecolmodel.2009.08.012>
- Gibson, R.N., Ezzi, I.A., 1992. The relative profitability of particulate- and filter-feeding in the herring, *Clupea harengus* L. *Journal of Fish Biology* 40, 577–590. <https://doi.org/10.1111/j.1095-8649.1992.tb02607.x>
- Gilbert, B., Tunney, T.D., McCann, K.S., DeLong, J.P., Vasseur, D.A., Savage, V., Shurin, J.B., Dell, A.I., Barton, B.T., Harley, C.D.G., Kharouba, H.M., Kratina, P., Blanchard, J.L., Clements, C., Winder, M., Greig, H.S., O'Connor, M.I., 2014. A bioenergetic framework for the temperature dependence of trophic interactions. *Ecology Letters* 17, 902–914. <https://doi.org/10.1111/ele.12307>
- Gilg, O., Sittler, B., Sabard, B., Hurstel, A., Sané, R., Delattre, P., Hanski, I., 2006. Functional and numerical responses of four lemming predators in high arctic Greenland. *Oikos* 113, 193–216. <https://doi.org/10.1111/j.2006.0030-1299.14125.x>
- Gilioli, G., Baumgärtner, J., Vacante, V., 2005. Temperature Influences on Functional Response of *Coenosia attenuata* (Diptera: Muscidae) Individuals. *Journal of Economic Entomology* 98, 1524–1530. <https://doi.org/10.1603/0022-0493-98.5.1524>
- Gismervik, I., 2005. Numerical and functional responses of choreo- and oligotrich planktonic ciliates. *Aquatic Microbial Ecology* 40, 163–173. <https://doi.org/10.3354/ame040163>
- Gitonga, L.M., Overholt, W.A., Löhr, B., Magambo, J.K., Mueke, J.M., 2002. Functional response of *Orius albidipennis* (Hemiptera: Anthoridae) to *Megalurothrips sjostedti* (Thysanoptera: Thripidae). *Biological Control* 24, 1–6. [https://doi.org/10.1016/S1049-9644\(02\)00001-4](https://doi.org/10.1016/S1049-9644(02)00001-4)
- Gonçalves, V., Gherardi, F., Rebelo, R., 2016. Modelling the predation effects of invasive crayfish, *Procambarus clarkii* (Girard, 1852), on invasive zebra mussel, *Dreissena polymorpha* (Pallas, 1771), under laboratory conditions. *Italian Journal of Zoology* 83, 59–67. <https://doi.org/10.1080/11250003.2016.1138558>
- Gotoh, T., Nozawa, M., Yamaguchi, K., 2004. Prey consumption and functional response of three acarophagous species to eggs of the two-spotted spider mite in the laboratory. *Applied Entomology and Zoology* 39, 97–105. <https://doi.org/10.1303/aez.2004.97>
- Greene, C.H., Landry, M.R., Monger, B.C., 1986. Foraging Behavior and Prey Selection by the Ambush Entangling Predator *Pleurobrachia bachei*. *Ecology* 67, 1493–1501. <https://doi.org/10.2307/1939080>
- Gresens, S.E., Cothran, M.L., Thorp, J.H., 1982. The influence of temperature on the functional response of the dragonfly *Celithemis fasciata* (Odonata: Libellulidae). *Oecologia* 53, 281–284. <https://doi.org/10.1007/BF00388999>

- Griffen, B.D., Delaney, D.G., 2007. Species Invasion Shifts the Importance of Predator Dependence. *Ecology* 88, 3012–3021. <https://doi.org/10.1890/07-0172.1>
- Gulbrandsen, J., 1991. Functional response of Atlantic halibut larvae related to prey density and distribution. *Aquaculture* 94, 89–98. [https://doi.org/10.1016/0044-8486\(91\)90131-P](https://doi.org/10.1016/0044-8486(91)90131-P)
- Gupta, R.K., Pervez, A., Guroo, M.A., Srivastava, K., 2012. Stage-specific functional response of an aphidophagous ladybird, *Coccinella septempunctata* (Coleoptera: Coccinellidae), to two aphid species. *International Journal of Tropical Insect Science* 32, 136–141. <https://doi.org/10.1017/S1742758412000227>
- Gustafsson, P., Bergman, E., Greenberg, L.A., 2010. Functional response and size-dependent foraging on aquatic and terrestrial prey by brown trout (*Salmo trutta* L.). *Ecology of Freshwater Fish* 19, 170–177. <https://doi.org/10.1111/j.1600-0633.2009.00401.x>
- Hada, A., Uye, S., 1991. Cannibalistic feeding behavior of the brackish-water copepod *Sinocalanus tenellus*. *J Plankton Res* 13, 155–166. <https://doi.org/10.1093/plankt/13.1.155>
- Haddaway, N.R., Wilcox, R.H., Heptonstall, R.E.A., Griffiths, H.M., Mortimer, R.J.G., Christmas, M., Dunn, A.M., 2012. Predatory Functional Response and Prey Choice Identify Predation Differences between Native/Invasive and Parasitised/Unparasitised Crayfish. *PLOS ONE* 7, e32229. <https://doi.org/10.1371/journal.pone.0032229>
- Hammill, E., Petchey, O.L., Anholt, B.R., 2010. Predator Functional Response Changed by Induced Defenses in Prey. *The American Naturalist* 176, 723–731. <https://doi.org/10.1086/657040>
- Hansen, B., Tande, K.S., Berggreen, U.C., 1990. On the trophic fate of *Phaeocystis pouchetii* (Harlot). III. Functional responses in grazing demonstrated on juvenile stages of *Calanus finmarchicus* (Copepoda) fed diatoms and Phaeocystis. *J Plankton Res* 12, 1173–1187. <https://doi.org/10.1093/plankt/12.6.1173>
- Hansen, P.J., 1992. Prey size selection, feeding rates and growth dynamics of heterotrophic dinoflagellates with special emphasis on Gyrodinium spirale. *Marine Biology* 114, 327–334. <https://doi.org/10.1007/BF00349535>
- Hansen, P.J., Nielsen, T.G., 1997. Mixotrophic feeding of *Fragilidium subglobosum* (Dinophyceae) on three species of *Ceratium*: effects of prey concentration, prey species and light intensity. *Marine Ecology Progress Series* 147, 187–196. <https://doi.org/10.3354/meps147187>
- Harborne, A.R., 2012. Seasonal variation in the functional response of a coral-reef piscivore alters the inverse density-dependent mortality of its prey. *Coral Reefs* 31, 247–251. <https://doi.org/10.1007/s00338-011-0840-5>
- Hardman, J.M., Rogers, M.L., 1991. Effects of Temperature and Prey Density on Survival, Development, and Feeding Rates of Immature *Typhlodromus pyri* (Acari: Phytoseiidae). *Environ Entomol* 20, 1089–1096. <https://doi.org/10.1093/ee/20.4.1089>
- Hardman, J.M., Turnbull, A.L., 1980. Functional response of the wolf spider, *Pardosa vancouveri*, to changes in the density of vestigial-winged fruit flies. *Res Popul Ecol* 21, 233–259. <https://doi.org/10.1007/BF02513624>
- Hardman, J.M., Turnbull, A.L., 1974. The Interaction of Spatial Heterogeneity, Predator Competition and the Functional Response to Prey Density in a Laboratory System of Wolf Spiders (Araneae: Lycosidae) and Fruit Flies (Diptera: Drosophilidae). *Journal of Animal Ecology* 43, 155–171. <https://doi.org/10.2307/3164>
- Hassanpour, M., Mohaghegh, J., Iranipour, S., Nouri-Ganbalani, G., Enkegaard, A., 2011. Functional response of *Chrysoperla carnea* (Neuroptera: Chrysopidae) to *Helicoverpa armigera* (Lepidoptera: Noctuidae): Effect of prey and predator stages. *Insect Science* 18, 217–224. <https://doi.org/10.1111/j.1744-7917.2010.01360.x>
- Hassell, M.P., 1971. Mutual Interference between Searching Insect Parasites. *Journal of Animal Ecology* 40, 473–486. <https://doi.org/10.2307/3256>



- Hassell, M.P., Lawton, J.H., Beddington, J.R., 1977. Sigmoid Functional Responses by Invertebrate Predators and Parasitoids. *Journal of Animal Ecology* 46, 249–262. <https://doi.org/10.2307/3959>
- Hauzy, C., Tully, T., Spataro, T., Paul, G., Arditi, R., 2010. Spatial heterogeneity and functional response: an experiment in microcosms with varying obstacle densities. *Oecologia* 163, 625–636. <https://doi.org/10.1007/s00442-010-1585-5>
- He, Y., Zhao, J., Zheng, Y., Desneux, N., Wu, K., 2012. Lethal effect of imidacloprid on the coccinellid predator *Serangium japonicum* and sublethal effects on predator voracity and on functional response to the whitefly *Bemisia tabaci*. *Ecotoxicology* 21, 1291–1300. <https://doi.org/10.1007/s10646-012-0883-6>
- Hedgspeth, M.L., Nilsson, P.A., Berglund, O., 2014. Ecological implications of altered fish foraging after exposure to an antidepressant pharmaceutical. *Aquatic Toxicology, Antidepressants in the Aquatic Environment* 151, 84–87. <https://doi.org/10.1016/j.aquatox.2013.12.011>
- Heidarian, M., Fathipour, Y., Kamali, K., 2012. Functional response, switching, and prey-stage preference of *Scolothrips longicornis* (Thysanoptera: Thripidae) on *Schizotetranychus smirnovi* (Acari: Tetranychidae). *Journal of Asia-Pacific Entomology*.
- Heimpel, G.E., Hough-Goldstein, J.A., 1994. Components of the Functional Response of *Perillus bioculatus* (Hemiptera: Pentatomidae). *Environ Entomol* 23, 855–859. <https://doi.org/10.1093/ee/23.4.855>
- Helenius, L.K., Saiz, E., 2017. Feeding behaviour of the nauplii of the marine calanoid copepod *Paracartia grani* Sars: Functional response, prey size spectrum, and effects of the presence of alternative prey. *PLOS ONE* 12, e0172902. <https://doi.org/10.1371/journal.pone.0172902>
- Heong, K.L., Bleih, S., Rubia, E.G., 1991. Prey preference of the wolf spider, *Pardosa pseudoannulata* (Boesenberg et Strand). *Res Popul Ecol* 33, 179–186. <https://doi.org/10.1007/BF02513547>
- Hewett, S.W., 1980. The Effect of Prey Size on the Functional and Numerical Responses of a Protozoan Predator to Its Prey. *Ecology* 61, 1075–1081. <https://doi.org/10.2307/1936826>
- Hildrew, A.G., Townsend, C.R., 1977. The influence of substrate on the functional response of *Plectrocnemia conspersa* (Curtis) larvae (Trichoptera: Polycentropodidae). *Oecologia* 31, 21–26. <https://doi.org/10.1007/BF00348705>
- Hjelm, J., Johansson, F., 2003. Temporal variation in feeding morphology and size-structured population dynamics in fishes. *Proc Biol Sci* 270, 1407–1412. <https://doi.org/10.1098/rspb.2003.2376>
- Hohberg, K., Traunspurger, W., 2005. Predator–prey interaction in soil food web: functional response, size-dependent foraging efficiency, and the influence of soil texture. *Biol Fertil Soils* 41, 419–427. <https://doi.org/10.1007/s00374-005-0852-9>
- Holling, C.S., 1965. The Functional Response of Predators to Prey Density and its Role in Mimicry and Population Regulation. *The Memoirs of the Entomological Society of Canada* 97, 5–60. <https://doi.org/10.4039/entm9745fv>
- Holling, C.S., 1959a. The Components of Predation as Revealed by a Study of Small-Mammal Predation of the European Pine Sawfly1. *The Canadian Entomologist* 91, 293–320. <https://doi.org/10.4039/Ent91293-5>
- Holling, C.S., 1959b. The Components of Predation as Revealed by a Study of Small-Mammal Predation of the European Pine Sawfly. *The Canadian Entomologist* 91, 293–320. <https://doi.org/10.4039/Ent91293-5>
- Hooff, R.C., Bollens, S.M., 2004. Functional response and potential predatory impact of *Tortanus dextrilobatus*, a carnivorous copepod recently introduced to the San Francisco Estuary. *Marine Ecology Progress Series* 277, 167–179. <https://doi.org/10.3354/meps277167>
- Hoque, M.F., Islam, M.W., Khalequzzaman, M., 2010. Functional response of *Phytoseiulus persimilis* Athias-Henriot to *Tetranychus urticae* Koch: effects of prey life stages and temperature.

- University Journal of Zoology, Rajshahi University 29, 1–8.  
<https://doi.org/10.3329/ujzru.v29i1.9458>
- Hossie, T.J., Murray, D.L., 2010. You can't run but you can hide: refuge use in frog tadpoles elicits density-dependent predation by dragonfly larvae. *Oecologia* 163, 395–404.  
<https://doi.org/10.1007/s00442-010-1568-6>
- Houde, E.D., Schekter, R.C., 1980. Feeding by marine fish larvae: developmental and functional responses. *Environ Biol Fish* 5, 315–334. <https://doi.org/10.1007/BF00005186>
- Houde, S.E.L., Roman, M.R., 1987. Effects of food quality on the functional ingestion response of the copepod *Acartia tonsa*. *Marine Ecology Progress Series* 40, 69–77.
- Hunt, R.J., Swift, M., 2010. Predation by Larval Damselflies on Cladocerans. *Journal of Freshwater Ecology* 25, 345–351. <https://doi.org/10.1080/02705060.2010.9664377>
- Hyatt, K.D., 1980. Mechanisms of food resource partitioning and the foraging strategies of rainbow trout (*Salmo gairdneri*) and kokanee (*Oncorhynchus nerka*) in Marion Lake, British Columbia. University of British Columbia. <https://doi.org/10.14288/1.0095431>
- Iribarne, O., Armstrong, D., Fernández, M., 1995. Environmental impact of intertidal juvenile dungeness crab habitat enhancement: effects on bivalves and crab foraging rate. *Journal of Experimental Marine Biology and Ecology* 192, 173–194. [https://doi.org/10.1016/0022-0981\(95\)00060-5](https://doi.org/10.1016/0022-0981(95)00060-5)
- Isari, S., Saiz, E., 2011. Feeding performance of the copepod *Clausocalanus lividus* (Frost and Fleminger, 1968). *J Plankton Res* 33, 715–728. <https://doi.org/10.1093/plankt/fbq149>
- Ishenhour, D.J., Yeargan, K.V., 1981. Predation by *Orius insidiosus* on the Soybean Thrips, *Sericothrips variabilis*: Effect of Prey Stage and Density. *Environ Entomol* 10, 496–500.  
<https://doi.org/10.1093/ee/10.4.496>
- Işikber, A.A., 2005. Functional Response of Two Coccinellid Predators, *Scymnus levillanti* and *Cycloneda sanguinea*, to the Cotton Aphid, *Aphis gossypii*. *Turk J Agric For* 29, 347–355.
- Iyer, N., Rao, T., 1996. Responses of the predatory rotifer *Asplanchna intermedia* to prey species differing in vulnerability: laboratory and field studies. *Freshwater Biology* 36, 521–533.  
<https://doi.org/10.1046/j.1365-2427.1996.d01-510.x>
- Jacobson, D.M., Anderson, D.M., 1993. Growth and grazing rates of *Protoperidinium hirobis* Abè, a thecate heterotrophic dinoflagellate. *J Plankton Res* 15, 723–736.  
<https://doi.org/10.1093/plankt/15.7.723>
- Jafari, S., Fathipour, Y., Faraji, F., 2012. The influence of temperature on the functional response and prey consumption of *Neoseiulus barkeri* (Acari: Phytoseiidae) on *Tetranychus urticae* (Acari: Tetranychidae). *Journal of Entomological Society of Iran* 31, 39–52.
- Jakobsen, H., Hansen, P., 1997. Prey size selection, grazing and growth response of the small heterotrophic dinoflagellate *Gymnodinium* sp. and the ciliate *Balanion comatum*--a comparative study. *Marine Ecology Progress Series* 158, 75–86. <https://doi.org/10.3354/meps158075>
- Jaspers, C., Titelman, J., Hansson, L.J., Haraldsson, M., Ditlefsen, C.R., 2011. The invasive ctenophore *Mnemiopsis leidyi* poses no direct threat to Baltic cod eggs and larva. *Limnology and Oceanography* 56, 431–439. <https://doi.org/10.4319/lo.2011.56.2.0431>
- Jeong, H.J., Ha, J.H., Yoo, Y.D., Park, J.Y., Kim, J.H., Kang, N.S., Kim, T.H., Kim, H.S., Yih, W.H., 2007a. Feeding by the Pfiesteria-like heterotrophic dinoflagellate *Luciella masanensis*. *J. Eukaryot. Microbiol.* 54, 231–241. <https://doi.org/10.1111/j.1550-7408.2007.00259.x>
- Jeong, Hae Jin, Kang, H., Shim, J.H., Park, J.K., Kim, J.S., Song, J.Y., Choi, H.-J., 2001. Interactions among the toxic dinoflagellate *Amphidinium carterae*, the heterotrophic dinoflagellate *Oxyrrhis marina*, and the calanoid copepods *Acartia* spp. *Marine Ecology Progress Series* 218, 77–86.
- Jeong, H.J., Kang, H.C., You, J.H., Jang, S.H., 2018a. Interactions between the Newly Described Small- and Fast-Swimming Mixotrophic Dinoflagellate *Yihiella yeosuensis* and Common Heterotrophic Protists. *J. Eukaryot. Microbiol.* 65, 612–626. <https://doi.org/10.1111/jeu.12506>

- Jeong, H.J., Kim, J.S., Song, J.Y., Kim, J.H., Kim, T.H., Kim, S.K., Kang, N.S., 2007b. Feeding by protists and copepods on the heterotrophic dinoflagellates *Pfiesteria piscicida*, *Stoeckeria algicida*, and *Luciella masanensis*. Marine Ecology Progress Series 349, 199–211. <https://doi.org/10.3354/meps07094>
- Jeong, H. J., Kim, S.K., Kim, J.S., Kim, S.T., Yoo, Y.D., Yoon, J.Y., 2001. Growth and grazing rates of the heterotrophic dinoflagellate *Polykrikos kofoidii* on red-tide and toxic dinoflagellates. J. Eukaryot. Microbiol. 48, 298–308.
- Jeong, H.J., Latz, M.I., 1994. Growth and grazing rates of the heterotrophic dinoflagellates *Protoperdinium* spp. on red tide dinoflagellates. Marine Ecology Progress Series 106, 173–185.
- Jeong, H.J., Lee, K.H., Yoo, Y.D., Kang, N.S., Lee, K., 2011. Feeding by the Newly Described, Nematocyst-Bearing Heterotrophic Dinoflagellate *Gyrodiniellum shiwhaense*. Journal of Eukaryotic Microbiology 58, 511–524. <https://doi.org/10.1111/j.1550-7408.2011.00580.x>
- Jeong, H.J., Shim, J.H., Lee, C.W., Kim, J.S., Koh, S.M., 1999. Growth and Grazing Rates of the Marine Planktonic Ciliate *Strombidinopsis* sp. on Red-Tide and Toxic Dinoflagellates. Journal of Eukaryotic Microbiology 46, 69–76. <https://doi.org/10.1111/j.1550-7408.1999.tb04586.x>
- Jeong, H.J., Song, J.E., Kang, N.S., Kim, S., Yoo, Y.D., Park, J.Y., 2007c. Feeding by heterotrophic dinoflagellates on the common marine heterotrophic nanoflagellate *Cafeteria* sp. Marine Ecology Progress Series 333, 151–160. <https://doi.org/10.3354/meps333151>
- Jeong, H.J., Yoo, Y.D., Kim, J.S., Kang, N.S., Kim, T.H., Kim, J.H., 2004. Feeding by the marine planktonic ciliate *Strombidinopsis jeokjo* on common heterotrophic dinoflagellates. Aquatic Microbial Ecology 36, 181–187. <https://doi.org/10.3354/ame036181>
- Jeong, H.J., Yoon, J.Y., Kim, J.S., Yoo, Y.D., Seong, K.A., 2002. Growth and grazing rates of the prostomatid ciliate *Tiarina fusus* on red-tide and toxic algae. Aquatic Microbial Ecology 28, 289–297. <https://doi.org/10.3354/ame028289>
- Jeong, H.J., You, J.H., Lee, K.H., Kim, S.J., Lee, S.Y., 2018b. Feeding by common heterotrophic protists on the mixotrophic alga *Gymnodinium smaydae* (Dinophyceae), one of the fastest growing dinoflagellates. Journal of Phycology 54, 734–743. <https://doi.org/10.1111/jpy.12775>
- Jeschke, J.M., Tollrian, R., 2005. Effects of predator confusion on functional responses. Oikos 111, 547–555. <https://doi.org/10.1111/j.1600-0706.2005.14118.x>
- Johansson, F., Leonardsson, K., 1998. Swimming speeds and activity levels of consumers at various resource and consumer densities under predation risk. Can. J. Zool. 76, 76–82. <https://doi.org/10.1139/z97-165>
- Johansson, L., 1987. Experimental evidence for interactive habitat segregation between roach (*Rutilus rutilus*) and rudd (*Scardinius erythrophthalmus*) in a shallow eutrophic lake. Oecologia 73, 21–27. <https://doi.org/10.1007/BF00376972>
- John, E.H., Davidson, K., 2001. Prey selectivity and the influence of prey carbon:nitrogen ratio on microflagellate grazing. J. Exp. Mar. Biol. Ecol. 260, 93–111.
- Johnson, D.W., 2006. Predation, Habitat Complexity, and Variation in Density-Dependent Mortality of Temperate Reef Fishes. Ecology 87, 1179–1188. [https://doi.org/10.1890/0012-9658\(2006\)87\[1179:PHCAVI\]2.0.CO;2](https://doi.org/10.1890/0012-9658(2006)87[1179:PHCAVI]2.0.CO;2)
- Jones, D.B., Giles, K.L., Elliott, N.C., Payton, M.E., 2007. Parasitism of Greenbug, *Schizaphis graminum*, by the Parasitoid *Lysiphlebus testaceipes* at Winter Temperatures. Environmental Entomology 36, 1–8. [https://doi.org/10.1603/0046-225X\(2007\)36\[1:POGSGB\]2.0.CO;2](https://doi.org/10.1603/0046-225X(2007)36[1:POGSGB]2.0.CO;2)
- Kalinoski, R.M., DeLong, J.P., 2016. Beyond body mass: how prey traits improve predictions of functional response parameters. Oecologia 180, 543–550. <https://doi.org/10.1007/s00442-015-3487-z>
- Kalsi, M., Seal, D.R., Nuessly, G.S., Capinera, J.L., Martin, C.G., 2014. Distribution of *Zelus longipes* (Hemiptera: Reduviidae) in South Florida Corn Fields and Its Functional Response to Corn-

- Infesting Picture-Winged Flies (Diptera: Ulidiidae). *Environ Entomol* 43, 1223–1234. <https://doi.org/10.1603/EN13271>
- Kamiyama, T., 1997. Growth and grazing responses of tintinnid ciliates feeding on the toxic dinoflagellate *Heterocapsa circularisquama*. *Marine Biology* 128, 509–515. <https://doi.org/10.1007/s002270050117>
- Kamiyama, T., Tsujino, M., Matsuyama, Y., Uchida, T., 2005. Growth and grazing rates of the tintinnid ciliate *Favella taraikaensis* on the toxic dinoflagellate *Alexandrium tamarense*. *Marine Biology* 147, 989–997. <https://doi.org/10.1007/s00227-005-1629-2>
- Kasap, I., Atlihan, R., 2011. Consumption rate and functional response of the predaceous mite *Kampimodromus aberrans* to two-spotted spider mite *Tetranychus urticae* in the laboratory. *Exp Appl Acarol* 53, 253–261. <https://doi.org/10.1007/s10493-010-9400-x>
- Katz, C.H., 1985. A Nonequilibrium Marine Predator-Prey Interaction. *Ecology* 66, 1426–1438. <https://doi.org/10.2307/1938005>
- Khan, A.A., 2013. Evaluation of the biological control efficiency of four spiders using functional response experiments. *The Bioscan* 8, 1123–1128.
- Khan, A.A., 2012. Functional response of *Pardosa altitudis* Tikader and Malhotra, *Teragnatha maxillosa* Thorell, *Neoscona mukherjei* Tikader and *heridion* sp. to rice grasshopper *Oxya nitidula* (Wlk.). *Oryza* 49, 39–44.
- Khan, A.A., 2009. Functional response of *Adalia tetraspilota* (Hope) (Coleoptera: Coccinellidae) on cabbage aphid, *Brevicoryne brassicae* (L.). *Journal of Biological Control* 23, 246–248.
- Khan, A.A., Shah, M.A., Majid, S., 2016. Functional Response of Four Syrphid Predators Associated With Green Apple Aphid (Hemiptera: Aphididae) in Laboratory. *J Econ Entomol* 109, 78–83. <https://doi.org/10.1093/jee/tov264>
- Kharboutli, M.S., Mack, T.P., 1993. Effect of Temperature, Humidity, and Prey Density on Feeding Rate of the Striped Earwig (Dermaptera: Labiduridae). *Environ Entomol* 22, 1134–1139. <https://doi.org/10.1093/ee/22.5.1134>
- Kim, J.S., Jeong, H.J., 2004. Feeding by the heterotrophic dinoflagellates *Gyrodinium dominans* and *G. spirale* on the red-tide dinoflagellate *Prorocentrum minimum*. *Marine Ecology Progress Series* 280, 85–94. <https://doi.org/10.3354/meps280085>
- Kimmance, S.A., Atkinson, D., Montagnes, D.J.S., 2006. Do temperature–food interactions matter? Responses of production and its components in the model heterotrophic flagellate *Oxyrrhis marina*. *Aquatic Microbial Ecology* 42, 63–73. <https://doi.org/10.3354/ame042063>
- Koch, R.L., Hutchison, W.D., Venette, R.C., Heimpel, G.E., 2003. Susceptibility of immature monarch butterfly, *Danaus plexippus* (Lepidoptera: Nymphalidae: Danainae), to predation by *Harmonia axyridis* (Coleoptera: Coccinellidae). *Biological Control* 28, 265–270. [https://doi.org/10.1016/S1049-9644\(03\)00102-6](https://doi.org/10.1016/S1049-9644(03)00102-6)
- Kopp, M., Tollrian, R., 2003. Trophic size polyphenism in lembadion bullinum: costs and benefits of an inducible offense. *Ecology* 84, 641–651. [https://doi.org/10.1890/0012-9658\(2003\)084\[0641:TSPILB\]2.0.CO;2](https://doi.org/10.1890/0012-9658(2003)084[0641:TSPILB]2.0.CO;2)
- Korpimäki, E., Norrdahl, K., 1991. Numerical and Functional Responses of Kestrels, Short-Eared Owls, and Long-Eared Owls to Vole Densities. *Ecology* 72, 814–826. <https://doi.org/10.2307/1940584>
- Korstad, J., Vadstein, O., Olsen, Y., 1989. Feeding kinetics of *Brachionus plicatilis* fed *Isochrysis galbana*. *Hydrobiologia* 186, 51–57. <https://doi.org/10.1007/BF00048896>
- Koski, M.L., Johnson, B.M., 2002. Functional response of kokanee salmon (*Oncorhynchus nerka*) to *Daphnia* at different light levels. *Can. J. Fish. Aquat. Sci.* 59, 707–716. <https://doi.org/10.1139/f02-045>

- Koveos, D.S., Broufas, G.D., 2000. Functional response of *Euseius finlandicus* and *Amblyseius andersoni* to *Panonychus ulmi* on apple and peach leaves in the laboratory. *Exp Appl Acarol* 24, 247–256. <https://doi.org/10.1023/A:1006431710313>
- Kratina, P., Vos, M., Anholt, B.R., 2007. Species Diversity Modulates Predation. *Ecology* 88, 1917–1923. <https://doi.org/10.1890/06-1507.1>
- Kremer, P., Reeve, M.R., Syms, M.A., 1986. The nutritional ecology of the ctenophore *Bolinopsis vitrea*: comparisons with *Mnemiopsis mccradyi* from the same region. *J Plankton Res* 8, 1197–1208. <https://doi.org/10.1093/plankt/8.6.1197>
- Krishnaraj, R., Pritchard, G., 1995. The influence of larval size, temperature, and components of the functional response to prey density on growth rates of the dragonflies *Lestes disjunctus* and *Coenagrion resolutum* (Insecta: Odonata). *Can. J. Zool.* 73, 1672–1680. <https://doi.org/10.1139/z95-199>
- Kroetz, A.M., Powers, S.P., 2015. Eating between the lines: functional feeding response of bonnetheads (*Sphyrna tiburo*). *Environ Biol Fish* 98, 655–661. <https://doi.org/10.1007/s10641-014-0302-3>
- Krylov, P.I., 1988. Predation of the freshwater cyclopoid copepod *Megacyclops gigas* on lake zooplankton: Functional response and prey selection. *Archiv fuer Hydrobiologie* 113, 231–250.
- Kumar, B., Mishra, G., OMKAR, 2014. Functional response and predatory interactions in conspecific and heterospecific combinations of two congeneric species (Coleoptera: Coccinellidae). *EJE* 111, 257–265. <https://doi.org/10.14411/eje.2014.025>
- Kumar, R., Rao, T.R., 2003. Predation on Mosquito Larvae by *Mesocyclops thermocyclopoidea* (Copepoda: Cyclopoida) in the Presence of Alternate Prey. *International Review of Hydrobiology* 88, 570–581. <https://doi.org/10.1002/iroh.200310631>
- Kushner, R.B., Hovel, K.A., 2006. Effects of native predators and eelgrass habitat structure on the introduced Asian mussel *Musculista senhousia* (Benson in Cantor) in southern California. *Journal of Experimental Marine Biology and Ecology* 332, 166–177. <https://doi.org/10.1016/j.jembe.2005.11.011>
- Kustutan, O., Cakmak, I., 2009. Development, Fecundity, and Prey Consumption of *Neoseiulus californicus* (McGregor) Fed *Tetranychus cinnabarinus* Boisduval. *Turkish Journal of Agriculture and Forestry* 33, 19–28.
- Lafontaine, Y. de, Leggett, W.C., 1988. Predation by Jellyfish on Larval Fish: An Experimental Evaluation Employing in situ Enclosures. *Can. J. Fish. Aquat. Sci.* 45, 1173–1190. <https://doi.org/10.1139/f88-140>
- Lafontaine, Y.D., Leggett, W.C., 1987. Effect of Container Size on Estimates of Mortality and Predation Rates in Experiments with Macrozooplankton and Larval Fish. *Can. J. Fish. Aquat. Sci.* 44, 1534–1543. <https://doi.org/10.1139/f87-185>
- Laing, J.E., Osborn, J.A.L., 1974. The effect of prey density on the functional and numerical responses of three species of predatory mites. *Entomophaga* 19, 267–277. <https://doi.org/10.1007/BF02371052>
- Lampert, W., 1994. Phenotypic plasticity of the filter screens in *Daphnia* : Adaptation to a low-food environment. *Limnology and Oceanography* 39, 997–1006. <https://doi.org/10.4319/lo.1994.39.5.0997>
- Lampitt, R.S., 1978. Carnivorous feeding by a small marine copepod. *Limnology and Oceanography* 23, 1228–1231. <https://doi.org/10.4319/lo.1978.23.6.1228>
- Laverty, C., Dick, J.T.A., Alexander, M.E., Lucy, F.E., 2015. Differential ecological impacts of invader and native predatory freshwater amphipods under environmental change are revealed by comparative functional responses. *Biol Invasions* 17, 1761–1770. <https://doi.org/10.1007/s10530-014-0832-9>

- Laybourn, J., 1976. Energy budgets for *Stentor coeruleus* Ehrenberg (Ciliophora). *Oecologia* 22, 431–437. <https://doi.org/10.1007/BF00345319>
- LeCato, G.L., 1978. Functional Response of Red Flour Beetles to Density of Cigarette Beetles and the Role of Predation in Population Regulations. *Environ Entomol* 7, 77–80. <https://doi.org/10.1093/ee/7.1.77>
- LeCato, G.L., Arbogast, R.T., 1979. Functional Response of *Xylocoris flavipes* to Angoumois Grain Moth and Influence of Predation on Regulation of Laboratory Populations. *J Econ Entomol* 72, 847–849. <https://doi.org/10.1093/jee/72.6.847>
- Lee, J.-H., Kang, T.-J., 2004. Functional response of *Harmonia axyridis* (Pallas) (Coleoptera: Coccinellidae) to *Aphis gossypii* Glover (Homoptera: Aphididae) in the Laboratory. *Biological Control* 31, 306–310. <https://doi.org/10.1016/j.biocontrol.2004.04.011>
- Letcher, B.H., Rice, J.A., Crowder, L.B., Binkowski, F.P., 1997. Size - and species-dependent variability in consumption and growth rates of larvae and juveniles of three freshwater fishes. *Can. J. Fish. Aquat. Sci.* 54, 405–414. <https://doi.org/10.1139/f96-273>
- Lim, A.S., Jeong, H.J., Ok, J.H., Kim, S.J., 2018. Feeding by the harmful phototrophic dinoflagellate *Takayama tasmanica* (Family Kareniaceae). *Harmful Algae* 74, 19–29. <https://doi.org/10.1016/j.hal.2018.03.009>
- Lin, S., Mulholland, M.R., Zhang, H., Feinstein, T.N., Jochem, F.J., Carpenter, E.J., 2004. Intense Grazing and Prey-Dependent Growth of *Pfiesteria piscicida* (dinophyceae). *Journal of Phycology* 40, 1062–1073. <https://doi.org/10.1111/j.1529-8817.2004.03217.x>
- Líznarová, E., Pekár, S., 2013. Dangerous prey is associated with a type 4 functional response in spiders. *Animal Behaviour* 85, 1183–1190. <https://doi.org/10.1016/j.anbehav.2013.03.004>
- Ljunggren, L., Sandström, A., 2007. Influence of visual conditions on foraging and growth of juvenile fishes with dissimilar sensory physiology. *Journal of Fish Biology* 70, 1319–1334. <https://doi.org/10.1111/j.1095-8649.2007.01412.x>
- Long, W.C., Popp, J., Swiney, K.M., Van Sant, S.B., 2012. Cannibalism in red king crab, *Paralithodes camtschaticus* (Tilesius, 1815): Effects of habitat type and predator density on predator functional response. *Journal of Experimental Marine Biology and Ecology* 422–423, 101–106. <https://doi.org/10.1016/j.jembe.2012.04.019>
- Long, W.C., Whitefleet-Smith, L., 2013. Cannibalism in red king crab: Habitat, ontogeny, and the predator functional response. *Journal of Experimental Marine Biology and Ecology* 449, 142–148. <https://doi.org/10.1016/j.jembe.2013.09.004>
- López-Urrutia, Á., Harris, R.P., Smith, T., 2004. Predation by calanoid copepods on the appendicularian *Oikopleura dioica*. *Limnology and Oceanography* 49, 303–307. <https://doi.org/10.4319/lo.2004.49.1.0303>
- Losey, J.E., Denno, R.F., 1998. Positive Predator–Predator Interactions: Enhanced Predation Rates and Synergistic Suppression of Aphid Populations. *Ecology* 79, 2143–2152. [https://doi.org/10.1890/0012-9658\(1998\)079\[2143:PPPIEP\]2.0.CO;2](https://doi.org/10.1890/0012-9658(1998)079[2143:PPPIEP]2.0.CO;2)
- Loughridge, A.H., Luff, M.L., 1983. Aphid Predation by *Harpalus rufipes* (Degeer) (Coleoptera: Carabidae) in the Laboratory and Field. *Journal of Applied Ecology* 20, 451–462. <https://doi.org/10.2307/2403519>
- Lyon, S.R., Sjulín, C.A., Sullivan, K.M., DeLong, J.P., 2018. Condition-dependent foraging in the wolf spider *Hogna baltimoriana*. *Food Webs* 14, 5–8. <https://doi.org/10.1016/j.fooweb.2017.12.003>
- MacNeil, C., Dick, J., Alexander, M., Dodd, J., Ricciardi, A., 2013. Predators vs. alien: differential biotic resistance to an invasive species by two resident predators. *NeoBiota* 19, 1–19. <https://doi.org/10.3897/neobiota.19.4839>

- Madadi, H., Enkegaard, A., Brodsgaard, H.F., Kharrazi-Pakdel, A., Mohaghegh, J., Ashouri, A., 2007. Host plant effects on the functional response of *Neoseiulus cucumeris* to onion thrips larvae. *Journal of Applied Entomology* 131, 728–733. <https://doi.org/10.1111/j.1439-0418.2007.01206.x>
- Madadi, H., Mohajeri Parizi, E., Allahyari, H., Enkegaard, A., 2011. Assessment of the biological control capability of *Hippodamia variegata* (Col.: Coccinellidae) using functional response experiments. *J Pest Sci* 84, 447–455. <https://doi.org/10.1007/s10340-011-0387-9>
- Mandour, N.S., El-Basha, N.A.-S., Liu, T.-X., 2006. Functional response of the ladybird, *Cydonia vicina nilotica* to cowpea aphid, *Aphis craccivora* in the laboratory. *Insect Science* 13, 49–54. <https://doi.org/10.1111/j.1744-7917.2006.00067.x>
- Mansour, F., Heimbach, U., 1993. Evaluation of lycosid, micryphantid and linyphiid spiders as predators of *Rhopalosiphum padi* (Hom.: Aphididae) and their functional response to prey density-laboratory experiments. *Entomophaga* 38, 79–87. <https://doi.org/10.1007/BF02373142>
- Márquez, L., Caballos, M., Domingues, P., 2007a. Functional response of early stages of the cuttlefish *Sepia officinalis* preying on the mysid *Mesopodopsis slabberi*. *Marine Biology Research* 3, 462–467. <https://doi.org/10.1080/17451000701751479>
- Márquez, L., Quintana, D., Almansa, E., Navas, J.I., 2007b. Effects of visual conditions and prey density on feeding kinetics of paralarvae of *Octopus vulgaris* from a laboratory spawning. *J Molluscan Stud* 73, 117–121. <https://doi.org/10.1093/mollus/eym003>
- Maselou, D., Perdikis, D., Fantinou, A., 2015. Effect of hunger level on prey consumption and functional response of the predator *Macrolophus pygmaeus*. *Bulletin of Insectology* 68, 211–218.
- McCaffrey, J.P., Horsburgh, R.L., 1986. Functional Response of *Orius insidiosus* (Hemiptera: Anthicoridae) to the European Red Mite, *Panonychus ulmi* (Acari: Tetranychidae), at Different Constant Temperatures. *Environ Entomol* 15, 532–535. <https://doi.org/10.1093/ee/15.3.532>
- McCann, K., Hastings, A., Huxel, G.R., 1998. Weak trophic interactions and the balance of nature. *Nature* 395, 794–798. <https://doi.org/10.1038/27427>
- McCoull, C.J., Swain, R., Barnes, R.W., 1998. Effect of temperature on the functional response and components of attack rate in *Naucoris congrex* Stål (Hemiptera: Naucoridae). *Australian Journal of Entomology* 37, 323–327. <https://doi.org/10.1111/j.1440-6055.1998.tb01591.x>
- McCoy, M.W., Bolker, B.M., Warkentin, K.M., Vonesh, J.R., 2011. Predicting Predation through Prey Ontogeny Using Size-Dependent Functional Response Models. *The American Naturalist* 177, 752–766. <https://doi.org/10.1086/659950>
- McMahon, J.W., Rigler, F.H., 1965. Feeding Rate of *Daphnia Magna* Straus in Different Foods Labeled with Radioactive Phosphorus. *Limnology and Oceanography* 10, 105–113. <https://doi.org/10.4319/lo.1965.10.1.0105>
- McQueen, D.J., 1969. Reduction of Zooplankton Standing Stocks by Predaceous *Cyclops bicuspidatus thomasi* in Marion Lake, British Columbia. *J. Fish. Res. Bd. Can.* 26, 1605–1618. <https://doi.org/10.1139/f69-144>
- Messier, F., 1994. Ungulate Population Models with Predation: A Case Study with the North American Moose. *Ecology* 75, 478–488. <https://doi.org/10.2307/1939551>
- Messina, F.J., Hanks, J.B., 1998. Host Plant Alters the Shape of the Functional Response of an Aphid Predator (Coleoptera: Coccinellidae). *Environ Entomol* 27, 1196–1202. <https://doi.org/10.1093/ee/27.5.1196>
- Michalko, R., Pekár, S., 2017. The Behavioral Type of a Top Predator Drives the Short-Term Dynamic of Intraguild Predation. *The American Naturalist* 189, 242–253. <https://doi.org/10.1086/690501>
- Midthassel, A., Leather, S.R., Wright, D.J., Baxter, I.H., 2014. The functional and numerical response of *Typhlodromips swirskii* (Acari: Phytoseiidae) to the factitious prey *Suidasia medanensis* (Acari: Suidasidae) in the context of a breeding sachet. *Biocontrol Science and Technology* 24, 361–374. <https://doi.org/10.1080/09583157.2013.863270>

- Miller, T.J., Crowder, L.B., Rice, J.A., Binkowski, F.P., 1992. Body Size and the Ontogeny of the Functional Response in Fishes. *Can. J. Fish. Aquat. Sci.* 49, 805–812. <https://doi.org/10.1139/f92-091>
- Mills, N.J., Laca, I., 2004. Ratio dependence in the functional response of insect parasitoids: evidence from *Trichogramma minutum* foraging for eggs in small host patches. *Ecological Entomology* 29, 208–216. <https://doi.org/10.1111/j.0307-6946.2004.00584.x>
- Moayeri, H.R.S., Madadi, H., Pouraskari, H., Enkegaard, A., 2013. Temperature dependent functional response of *Diaeretiella rapae* (Hymenoptera: Aphidiidae) to the cabbage aphid, *Brevicoryne brassicae* (Hemiptera: Aphididae). *EJE* 110, 109–113. <https://doi.org/10.14411/eje.2013.015>
- Mohaghegh, Clercq, D., Tirry, 2001. Functional response of the predators *Podisus maculiventris* (Say) and *Podisus nigrispinus* (Dallas) (Het., Pentatomidae) to the beet armyworm, *Spodoptera exigua* (Hübner) (Lep., Noctuidae): effect of temperature. *Journal of Applied Entomology* 125, 131–134. <https://doi.org/10.1046/j.1439-0418.2001.00519.x>
- Moksnes, P.-O., Lipcius, R.N., Pihl, L., van Montfrans, J., 1997. Cannibal–prey dynamics in young juveniles and postlarvae of the blue crab. *Journal of Experimental Marine Biology and Ecology* 215, 157–187. [https://doi.org/10.1016/S0022-0981\(97\)00052-X](https://doi.org/10.1016/S0022-0981(97)00052-X)
- Mondal, R.P., Ghosh, A., Bandyopadhyay, S., Chandra, G., 2014. Functional response analysis of *Anisops sardea* (Hemiptera: Notonectidae) against *Culex quinquefasciatus* in laboratory condition. *Indian J. Med. Res.* 140, 551–555.
- Monteleone, D.M., Duguay, L.E., 1988. Laboratory studies of predation by the ctenophore *Mnemiopsis leidyi* on the early stages in the life history of the bay anchovy, *Anchoa mitchilli*. *J Plankton Res* 10, 359–372. <https://doi.org/10.1093/plankt/10.3.359>
- Montserrat, M., Albajes, R., Castañé, C., 2000. Functional Response of Four Heteropteran Predators Preying on Greenhouse Whitefly (Homoptera: Aleyrodidae) and Western Flower Thrips (Thysanoptera: Thripidae). *Environ Entomol* 29, 1075–1082. <https://doi.org/10.1603/0046-225X-29.5.1075>
- Monzó, C., Mollá, Ó., Castañera, P., Urbaneja, A., 2009. Activity-density of *Pardosa cribata* in Spanish citrus orchards and its predatory capacity on *Ceratitis capitata* and *Myzus persicae*. *BioControl* 54, 393–402. <https://doi.org/10.1007/s10526-008-9199-0>
- Moore, M.V., 1988. Density-dependent predation of early instar *Chaoborus* feeding on multispecies prey assemblages. *Limnology and Oceanography* 33, 256–268. <https://doi.org/10.4319/lo.1988.33.2.0256>
- Morales, J., Burandt, C.L., 1985. Interactions Between *Cycloneda sanguinea* and the Brown Citrus Aphid: Adult Feeding and Larval Mortality. *Environ Entomol* 14, 520–522. <https://doi.org/10.1093/ee/14.4.520>
- Morales-Ventura, J., Nandini, S., Sarma, S.S.S., 2004. Functional responses during the early larval stages of the charal fish *Chirostoma riojai* (Pisces: Atherinidae) fed rotifers and cladocerans. *Journal of Applied Ichthyology* 20, 417–421. <https://doi.org/10.1111/j.1439-0426.2004.00565.x>
- Morand, P., Carré, C., Biggs, D.C., 1987. Feeding and metabolism of the jellyfish *Pelagia noctiluca* (scyphomedusae, semaestomae). *J Plankton Res* 9, 651–665. <https://doi.org/10.1093/plankt/9.4.651>
- Morozov, A., Arashkevich, E., Reigstad, M., Falk-Petersen, S., 2008. Influence of spatial heterogeneity on the type of zooplankton functional response: A study based on field observations. *Deep Sea Research Part II: Topical Studies in Oceanography, Carbon flux and ecosystem feedback in the northern Barents Sea in an era of climate change* 55, 2285–2291. <https://doi.org/10.1016/j.dsr2.2008.05.008>
- Moss, J.H., Beauchamp, D.A., 2007. Functional response of juvenile pink and chum salmon: effects of consumer size and two types of zooplankton prey. *Journal of Fish Biology* 70, 610–622. <https://doi.org/10.1111/j.1095-8649.2007.01340.x>



- Moustahfid, H., Tyrrell, M.C., Link, J.S., Nye, J.A., Smith, B.E., Gamble, R.J., 2010. Functional feeding responses of piscivorous fishes from the northeast US continental shelf. *Oecologia* 163, 1059–1067. <https://doi.org/10.1007/s00442-010-1596-2>
- Mrosso, F., Mwatawala, M., Rwegasira, G., 2013. Functional Responses of *Cheilomenes propingua*, *C. lunata* and *C. sulphurea* (Coleoptera: Coccinellidae) to Predation on *Aphis gossypii* (Homoptera: Aphididae) in Eastern Tanzania. *Journal of Entomology* 10, 76–85. <https://doi.org/10.3923/je.2013.76.85>
- Müller, H., Schlegel, A., 1999. Responses of three freshwater planktonic ciliates with different feeding modes to cryptophyte and diatom prey. *Aquatic Microbial Ecology* 17, 49–60.
- Munk, P., 1995. Foraging behaviour of larval cod (*Gadus morhua*) influenced by prey density and hunger. *Marine Biology* 122, 205–212. <https://doi.org/10.1007/BF00348933>
- Munk, P., Kiøboe, T., 1985. Feeding behaviour and swimming activity of larval herring (*Clupea harengus*) in relation to density of copepod nauplii. *Marine Ecology Progress Series* 24, 15–21. <https://doi.org/10.3354/meps024015>
- Munyaneza, J., Obrycki, J.J., 1997. Functional Response of *Coleomegilla maculata* (Coleoptera: Coccinellidae) to Colorado Potato Beetle Eggs (Coleoptera: Chrysomelidae). *Biological Control* 8, 215–224. <https://doi.org/10.1006/bcon.1997.0509>
- Murdie, G., Hassell, M.P., 1973. Food distribution, searching success and predator-prey models. The mathematical theory of the dynamics of biological populations 87–101.
- Murdoch, W.W., Avery, S., Smyth, M.E.B., 1975. Switching in Predatory Fish. *Ecology* 56, 1094–1105. <https://doi.org/10.2307/1936149>
- Murray, G.P.D., Stillman, R.A., Britton, J.R., 2016. Habitat complexity and food item size modify the foraging behaviour of a freshwater fish. *Hydrobiologia* 766, 321–332. <https://doi.org/10.1007/s10750-015-2465-0>
- Murray, G.P.D., Stillman, R.A., Gozlan, R.E., Britton, J.R., 2013. Experimental Predictions of The Functional Response of A Freshwater Fish. *Ethology* 119, 751–761. <https://doi.org/10.1111/eth.12117>
- Muschiol, D., Markovic, M., Threis, I., Traunspurger, W., 2008a. Predatory copepods can control nematode populations: A functional-response experiment with *Eucyclops subterraneus* and bacterivorous nematodes. *FUNDAMENTAL AND APPLIED LIMNOLOGY* 172.
- Muschiol, D., Traunspurger, W., Marković, M., Threis, I., 2008b. Predator-prey relationship between the cyclopoid copepod *Diacyclops bicuspidatus* and a free-living bacterivorous nematode. *Nematology* 10, 55–62. <https://doi.org/10.1163/156854108783360203>
- Nachappa, P., Braman, S.K., Guillebeau, L.P., All, J.N., 2006. Functional Response of the Tiger Beetle *Megacephala carolina carolina* (Coleoptera: Carabidae) on Twolined Spittlebug (Hemiptera: Cercopidae) and Fall Armyworm (Lepidoptera: Noctuidae). *Journal of Economic Entomology* 99, 1583–1589. <https://doi.org/10.1603/0022-0493-99.5.1583>
- Nagai, K., Yano, E., 2000. Predation by *Orius sauteri* (Poppus) (Heteroptera: Anthocoridae) on *Thrips palmi* Karny (Thysanoptera: Thripidae): Functional response and selective predation. *Applied Entomology and Zoology* 35, 565–574. <https://doi.org/10.1303/aez.2000.565>
- Nandini, S., Sarma, S.S.S., 1999. Effect of starvation time on the prey capture behaviour, functional response and population growth of *Asplanchna sieboldi* (Rotifera). *Freshwater Biology* 42, 121–130. <https://doi.org/10.1046/j.1365-2427.1999.00467.x>
- Nejstgaard, J.C., Båmstedt, U., Bagøien, E., Solberg, P.T., 1995. Algal constraints on copepod grazing. Growth state, toxicity, cell size, and season as regulating factors. *ICES J Mar Sci* 52, 347–357. [https://doi.org/10.1016/1054-3139\(95\)80050-6](https://doi.org/10.1016/1054-3139(95)80050-6)
- Nielsen, Ó.K., 1999. Gyrfalcon predation on ptarmigan: numerical and functional responses. *Journal of Animal Ecology* 68, 1034–1050. <https://doi.org/10.1046/j.1365-2656.1999.00351.x>

- Nilsen, E.B., Linnell, J.D.C., Odden, J., Andersen, R., 2009. Climate, season, and social status modulate the functional response of an efficient stalking predator: the Eurasian lynx. *J Anim Ecol* 78, 741–751. <https://doi.org/10.1111/j.1365-2656.2009.01547.x>
- Nordlund, D.A., Morrison, R.K., 1990. Handling time, prey preference, and functional response for *Chrysoperla rufilabris* in the laboratory. *Entomologia Experimentalis et Applicata* 57, 237–242. <https://doi.org/10.1111/j.1570-7458.1990.tb01435.x>
- Novak, M., Wootton, J.T., 2010. Using experimental indices to quantify the strength of species interactions. *Oikos* 119, 1057–1063. <https://doi.org/10.1111/j.1600-0706.2009.18147.x>
- Novich, R.A., Erickson, E.K., Kalinoski, R.M., DeLong, J.P., 2014. The temperature independence of interaction strength in a sit-and-wait predator. *Ecosphere* 5, art137. <https://doi.org/10.1890/ES14-00216.1>
- Nwilene, F.E., Nachman, G., 1996. Functional responses of *Iphiseius degenerans* and *Neoseiulus teke* (Acari: Phytoseiidae) to changes in the density of the cassava green mite, *Mononychellus tanajoa* (Acari: Tetranychidae). *Exp Appl Acarol* 20, 259–271. <https://doi.org/10.1007/BF00052876>
- O'Brien, W.J., Barfield, M., Sigler, K., 2001. The functional response of drift-feeding Arctic grayling: the effects of prey density, water velocity, and location efficiency. *Can. J. Fish. Aquat. Sci.* 58, 1957–1963. <https://doi.org/10.1139/f01-138>
- O'Donoghue, M., Boutin, S., Krebs, C.J., Zuleta, G., Murray, D.L., Hofer, E.J., 1998. Functional Responses of Coyotes and Lynx to the Snowshoe Hare Cycle. *Ecology* 79, 1193–1208. <https://doi.org/10.2307/176736>
- Ofuya, T.I., Akingbohunge, A.E., 1988. Functional and Numerical Responses of *Cheilomenes lunata* (Fabricius) (Coleoptera: Coccinellidae) Feeding on the Cowpea Aphid, *Aphis craccivora* Koch (Homoptera: Aphididae). *International Journal of Tropical Insect Science* 9, 543–546. <https://doi.org/10.1017/S1742758400011127>
- Ohlberger, J., Mehner, T., Staaks, G., Hölker, F., 2008. Is ecological segregation in a pair of sympatric coregonines supported by divergent feeding efficiencies? *Can. J. Fish. Aquat. Sci.* 65, 2105–2113. <https://doi.org/10.1139/F08-120>
- Olsen, E.M., Jørstad, T., Kaartvedt, S., 2000. The feeding strategies of two large marine copepods. *J Plankton Res* 22, 1513–1528. <https://doi.org/10.1093/plankt/22.8.1513>
- Opit, G.P., Roitberg, B., Gillespie, D.R., 1997. The functional response and prey preference of *Feltiella acarisuga* (Vallot) (Diptera: Cecidomyiidae) for two of its prey: male and female twospotted spider mites, *Tetranychus urticae* Koch (Acari: Tetranychidae). *The Canadian Entomologist* 129, 221–227. <https://doi.org/10.4039/Ent129221-2>
- Oyugi, D.O., Cucherousset, J., Baker, D.J., Britton, J.R., 2012. Effects of temperature on the foraging and growth rate of juvenile common carp, *Cyprinus carpio*. *Journal of Thermal Biology* 37, 89–94. <https://doi.org/10.1016/j.jtherbio.2011.11.005>
- Palanichamy, S., 1983. Influence of spatial heterogeneity and prey density on predatory behaviour of the tropical spiders *Cyrtophora cicatrosa* (Stoliczka) and *Marpissa calcutaensis* (Tikader) (Araneae, Araneidae). *Proc Ani Sci* 92, 429–435. <https://doi.org/10.1007/BF03186214>
- Papanikolaou, N.E., Martinou, A.F., Kontodimas, D.C., Matsinos, Y.G., Milonas, P.G., 2011. Functional responses of immature stages of *Propylea quatuordecimpunctata* (Coleoptera: Coccinellidae) to *Aphis fabae* (Hemiptera: Aphididae). *European Journal of Entomology* 108, 391–395. <https://doi.org/10.14411/eje.2011.049>
- Parajulee, M.N., Phillips, T.W., Hogg, D.B., 1994. Functional Response of *Lyctocoris campestris* (F.) Adults: Effects of Predator Sex, Prey Species, and Experimental Habitat. *Biological Control* 4, 80–87. <https://doi.org/10.1006/bcon.1994.1014>

- Parajulee, M.N., Shrestha, R.B., Leser, J.F., Wester, D.B., Blanco, C.A., 2006. Evaluation of the Functional Response of Selected Arthropod Predators on Bollworm Eggs in the Laboratory and Effect of Temperature on Their Predation Efficiency. *Environ Entomol* 35, 379–386. <https://doi.org/10.1603/0046-225X-35.2.379>
- Paulsson, N., n.d. Shape and dynamical consequences of the functional response of *Daphnia magna*.
- Pekár, S., 2005. Predatory characteristics of ant-eating *Zodariion* spiders (Araneae: Zodariidae): Potential biological control agents. *Biological Control* 34, 196–203. <https://doi.org/10.1016/j.biocontrol.2005.05.008>
- Pekár, S., Michalko, R., Loverre, P., Líznavá, E., Černecká, Ľ., 2015. Biological control in winter: novel evidence for the importance of generalist predators. *Journal of Applied Ecology* 52, 270–279. <https://doi.org/10.1111/1365-2664.12363>
- Persson, L., 1986. Temperature-Induced Shift in Foraging Ability in Two Fish Species, Roach (*Rutilus rutilus*) and Perch (*Perca fluviatilis*): Implications for Coexistence between Poikilotherms. *Journal of Animal Ecology* 55, 829–839. <https://doi.org/10.2307/4419>
- Persson, L., Greenberg, L.A., 1990. Optimal Foraging and Habitat Shift in Perch (*Perca Fluviatilis*) in a Resource Gradient. *Ecology* 71, 1699–1713. <https://doi.org/10.2307/1937579>
- Pervez, A., Omkar, 2005. Functional responses of coccinellid predators: An illustration of a logistic approach. *Journal of Insect Science* 5, 1–6.
- Pichlová, R., Vijverberg, J., 2001. A laboratory study of functional response of *Leptodora kindtii* to some cladoceran species and copepod nauplii. *Archiv für Hydrobiologie* 529–544. <https://doi.org/10.1127/archiv-hydrobiol/150/2001/529>
- Plaßmann, T., Maier, G., Stich, H.B., 1997. Predation impact of *Cyclops vicinus* on the rotifer community in Lake Constance in spring. *J Plankton Res* 19, 1069–1079. <https://doi.org/10.1093/plankt/19.8.1069>
- Poletti, M., Maia, A.H.N., Omoto, C., 2007. Toxicity of neonicotinoid insecticides to *Neoseiulus californicus* and *Phytoseiulus macropilis* (Acari: Phytoseiidae) and their impact on functional response to *Tetranychus urticae* (Acari: Tetranychidae). *Biological Control* 40, 30–36. <https://doi.org/10.1016/j.biocontrol.2006.09.001>
- Pollack, J.B., Mroch, R.M., Feller, R.J., 2008. Juvenile White Shrimp *Litopenaeus setiferus* Predation on Macro-benthic and Zooplanktonic Prey. *Journal of Shellfish Research* 27, 1247–1253. <https://doi.org/10.2983/0730-8000-27.5.1247>
- Porter, K.G., Gerritsen, J., Orcutt, J.D., 1982. The effect of food concentration on swimming patterns, feeding behavior, ingestion, assimilation, and respiration by *Daphnia*. *Limnology and Oceanography* 27, 935–949. <https://doi.org/10.4319/lo.1982.27.5.0935>
- Prokopenko, C.M., Turgeon, K., Fryxell, J.M., 2017. Evaluation of alternative prey-, predator-, and ratio-dependent functional response models in a zooplankton microcosm. *Can. J. Zool.* 95, 177–182. <https://doi.org/10.1139/cjz-2016-0106>
- Provencher, L., Coderre, D., 1987. Functional Responses and Switching of *Tetragnatha laboriosa* Hentz (Araneae: Tetragnathidae) and *Clubiona pikei* Gertsch (Araneae: Clubionidae) for the Aphids *Rhopalosiphum maidis* (Fitch) and *Rhopalosiphum padi* (L.) (Homoptera: Aphididae). *Environ Entomol* 16, 1305–1309. <https://doi.org/10.1093/ee/16.6.1305>
- Queiroz, O.S., Ramos, R.S., Gontijo, L.M., Picanço, M.C., 2015. Functional Response of Three Species of Predatory Pirate Bugs Attacking Eggs of *Tuta absoluta* (Lepidoptera: Gelechiidae). *Environ Entomol* 44, 246–251. <https://doi.org/10.1093/ee/nvu026>
- Quinn, T.P., Gende, S.M., Ruggerone, G.T., Rogers, D.E., 2003. Density-dependent predation by brown bears (*Ursus arctos*) on sockeye salmon (*Oncorhynchus nerka*). *Can. J. Fish. Aquat. Sci.* 60, 553–562. <https://doi.org/10.1139/f03-045>

- Rabette, C., Thouvenot, A., Lair, N., 1998. Laboratory experiments on trophic relationships and remote detection between two ciliates and *Cyclops vicinus vicinus*. *Hydrobiologia* 373, 157–167. <https://doi.org/10.1023/A:1017001725062>
- Rall, B.C., Brose, U., Hartvig, M., Kalinkat, G., Schwarzmüller, F., Vucic-Pestic, O., Petchey, O.L., 2012. Universal temperature and body-mass scaling of feeding rates. *Philos. Trans. R. Soc. Lond., B, Biol. Sci.* 367, 2923–2934. <https://doi.org/10.1098/rstb.2012.0242>
- Ranta, E., Nuutinen, V., 1985. Foraging by the Smooth Newt (*Triturus vulgaris*) on Zooplankton: Functional Responses and Diet Choice. *Journal of Animal Ecology* 54, 275–293. <https://doi.org/10.2307/4638>
- Redpath, S.M., Thirgood, S.J., 1999. Numerical and functional responses in generalist predators: hen harriers and peregrines on Scottish grouse moors. *Journal of Animal Ecology* 68, 879–892. <https://doi.org/10.1046/j.1365-2656.1999.00340.x>
- Reeve, M.R., Walter, M.A., Ikeda, T., 1978. Laboratory studies of ingestion and food utilization in lobate and tentaculate ctenophores. *Limnology and Oceanography* 23, 740–751. <https://doi.org/10.4319/lo.1978.23.4.0740>
- Řezáč, M., Pekár, S., Stará, J., 2010. The negative effect of some selective insecticides on the functional response of a potential biological control agent, the spider *Philodromus cespitum*. *BioControl* 55, 503–510. <https://doi.org/10.1007/s10526-010-9272-3>
- Rigler, F.H., 1961. The Relation Between Concentration of Food and Feeding Rate of *Daphnia Magna* Straus. *Can. J. Zool.* 39, 857–868. <https://doi.org/10.1139/z61-080>
- Rindone, R.R., Eggleston, D.B., 2011. Predator–prey dynamics between recently established stone crabs (*Menippe* spp.) and oyster prey (*Crassostrea virginica*). *Journal of Experimental Marine Biology and Ecology* 407, 216–225. <https://doi.org/10.1016/j.jembe.2011.06.018>
- Rocha, L. da, Redaelli, L.R., 2004. Functional response of *Cosmoclopius nigroannulatus* (Hem.: Reduviidae) to different densities of *Spartocera dentiventris* (Hem.: Coreidae) nymphae. *Brazilian Journal of Biology* 64, 309–316. <https://doi.org/10.1590/S1519-69842004000200017>
- Roche, K., 1990. Prey features affecting ingestion rates by *Acanthocyclops robustus* (Copepoda: Cyclopoida) on zooplankton. *Oecologia* 83, 76–82. <https://doi.org/10.1007/BF00324637>
- Rogers, D., 1972. Random Search and Insect Population Models. *Journal of Animal Ecology* 41, 369–383. <https://doi.org/10.2307/3474>
- Rogerson, A., 1981. The ecological energetics of *Amoeba proteus* (Protozoa). *Hydrobiologia* 85, 117. <https://doi.org/10.1007/BF00006621>
- Rohlf, W.M., Mack, T.P., 1984. Functional Response of *Ophion flavidus* Brulle (Hymenoptera: Ichneumonidae) Females to Various Densities of Fall Armyworm (*Spodoptera frugiperda* J. E. Smith) (Lepidoptera: Noctuidae). *Environ Entomol* 13, 708–710. <https://doi.org/10.1093/ee/13.3.708>
- Rosenbaum, B., Rall, B.C., 2018. Fitting functional responses: Direct parameter estimation by simulating differential equations. *Methods in Ecology and Evolution* 9, 2076–2090. <https://doi.org/10.1111/2041-210X.13039>
- Rossi, M.N., Reigada, C., Godoy, W.A.C., 2006. The effect of hunger level on predation dynamics in the spider *Nesticodes rufipes*: a functional response study. *Ecol Res* 21, 617–623. <https://doi.org/10.1007/s11284-006-0159-9>
- Rothhaupt, K.O., 1990. Changes of the functional responses of the rotifers *Brachionus rubens* and *Brachionus calyciflorus* with particle sizes. *Limnology and Oceanography* 35, 24–32. <https://doi.org/10.4319/lo.1990.35.1.0024>
- Ryer, C.H., Lawton, A., Lopez, R.J., Olla, B.L., 2002. A comparison of the functional ecology of visual vs. nonvisual foraging in two planktivorous marine fishes. *Can. J. Fish. Aquat. Sci.* 59, 1305–1314. <https://doi.org/10.1139/f02-097>

- Ryther, J.H., 1954. Inhibitory Effects of Phytoplankton upon the Feeding of *Daphnia Magna* with Reference to Growth, Reproduction, and Survival. *Ecology* 35, 522–533.  
<https://doi.org/10.2307/1931041>
- Saage, A., Vadstein, O., Sommer, U., 2009. Feeding behaviour of adult *Centropages hamatus* (Copepoda, Calanoida): Functional response and selective feeding experiments. *Journal of Sea Research* 62, 16–21. <https://doi.org/10.1016/j.seares.2009.01.002>
- Sabaghi, R., Sahragard, A., Hosseini, R., 2011. Functional and numerical responses of *Scymnus syriacus* Marseul (Coleoptera: Coccinellidae) to the black bean aphid, *Aphis fabae* Scopoli (Hemiptera: Aphididae) under laboratory conditions. *Journal of Plant Protection Research* 51, 423–428.
- Sahayaraj, K., Ambrose, D.P., 1994. Stage and host preference and functional response of a Reduviid predator *Acanthaspis pedestris* Stal to four cotton pests. *Journal of Biological Control* 8, 23–26.
- Sahayaraj, K., Kumar, V., Avery, P.B., 2015. Functional response of *Rhynocoris kumarii* (Hemiptera: Reduviidae) to different population densities of *Phenacoccus solenopsis* (Hemiptera: Pseudococcidae) recorded in the laboratory. *EJE* 112, 69–74.  
<https://doi.org/10.14411/eje.2015.020>
- Saiz, E., Kiørboe, T., 1995. Predatory and suspension feeding of the copepod *Acartia tonsa* in turbulent environments. *Marine Ecology Progress Series* 122, 147–158.  
<https://doi.org/10.3354/meps122147>
- Saleh, A., Ghabeish, I., Al-Zyoud, F., 2010. Functional Response of the Predator *Hippodamia variegata* (Goeze) (Coleoptera: Coccinellidae) Feeding on the Aphid *Brachycaudus helichrysi* (Kaltenbach) Infesting Chrysanthemum in the Laboratory. *Jordan Journal of Biological Sciences* 147, 1–8.
- Saljoqi, A.-U.-R., Asad, N., Khan, J., Ehsan-ul-Haq, Nasir, M., Zada, H., Ahmad, B., Nadeem, M., Huma, Z., Salim, M., 2016. Functional Response of *Chrysoperla carnea* Stephen (Neuroptera: Chrysopidae) Fed on Cabbage Aphid, *Brevicoryne brassicae* (Linnaeus) Under Laboratory Conditions. *Pakistan Journal of Zoology* 48, 165–169.
- Saljoqi, A.-U.-R., Nasir, M., Khan, J., Ehsan-ul-Haq, Salim, M., Nadeem, M., Huma, Z., Saeed, H.G., Ahmad, B., Zada, H., Rehman, S., 2015. Functional response study of *Cryptolaemus montrouzieri* Mulsant (Coleoptera: Coccinellidae) fed on Cotton mealy bug, *Phenacoccus solenopsis* Tinsley under Laboratory Conditions. *Journal of Entomology and Zoology Studies* 3, 411–415.
- Samu, F., Biro, Z., 2013. Functional response, multiple feeding and wasteful killing in a wolf spider (Araneae: Lycosidae). *EJE* 90, 471–476.
- Sandberg, E., 1997. Does oxygen deficiency modify the functional response of *Saduria entomon* (Isopoda) to *Bathyporeia pilosa* (Amphipoda)? *Marine Biology* 129, 499–504.  
<https://doi.org/10.1007/s002270050190>
- Sandheinrich, M.B., Atchison, G.J., 1989. Sublethal Copper Effects on Bluegill, *Lepomis macrochirus*, Foraging Behavior. *Can. J. Fish. Aquat. Sci.* 46, 1977–1985. <https://doi.org/10.1139/f89-248>
- Sandness, J.N., McMurtry, J.A., 1970. Functional response of three species of Phytoseiidae (Acarina) to prey density. *The Canadian Entomologist* 102, 692–704. <https://doi.org/10.4039/Ent102692-6>
- Sarma, S.S.S., Jimenez-Contreras, J., Fernandez, R., Nandini, S., Garcia-Garcia, G., 2013. Functional responses and feeding rates of *Mesocyclops pehpeiensis* Hu (Copepoda) fed different diets (rotifers, cladocerans, alga and cyanobacteria). *Journal of Natural History* 47, 841–852.
- Sarmiento, R.A., Pallini, A., Venzon, M., Souza, O.F.F. de, Molina-Rugama, A.J., Oliveira, C.L. de, 2007. Functional response of the predator *Eriopis connexa* (Coleoptera: Coccinellidae) to different prey types. *Brazilian Archives of Biology and Technology* 50, 121–126.  
<https://doi.org/10.1590/S1516-89132007000100014>
- Sarnelle, O., Wilson, A.E., 2008. Type III Functional Response in *Daphnia*. *Ecology* 89, 1723–1732.  
<https://doi.org/10.1890/07-0935.1>

- Schmidt, J.M., Crist, T.O., Wrinn, K., Rypstra, A.L., 2014. Predator interference alters foraging behavior of a generalist predatory arthropod. *Oecologia* 175, 501–508. <https://doi.org/10.1007/s00442-014-2922-x>
- Seiedy, M., Saboori, A., Allahyari, H., Talaei-Hassanloui, R., Tork, M., 2012. Functional Response of *Phytoseiulus persimilis* (Acari: Phytoseiidae) on Untreated and *Beauveria bassiana* - Treated Adults of *Tetranychus urticae* (Acari: Tetranychidae). *J Insect Behav* 25, 543–553. <https://doi.org/10.1007/s10905-012-9322-z>
- Seko, T., Miura, K., 2008. Functional response of the lady beetle *Harmonia axyridis* (Pallas) (Coleoptera: Coccinellidae) on the aphid *Myzus persicae* (Sulzer) (Homoptera: Aphididae). *Applied Entomology and Zoology* 43, 341–345. <https://doi.org/10.1303/aez.2008.341>
- Sell, A.F., Keuren, D. van, Madin, L.P., 2001. Predation by omnivorous copepods on early developmental stages of *Calanus finmarchicus* and *Pseudocalanus* spp. *Limnology and Oceanography* 46, 953–959. <https://doi.org/10.4319/lo.2001.46.4.0953>
- Sentis, A., G emard, C., Jaugeon, B., Boukal, D.S., 2017. Predator diversity and environmental change modify the strengths of trophic and nontrophic interactions. *Global Change Biology* 23, 2629–2640. <https://doi.org/10.1111/gcb.13560>
- Sentis, A., Hemptinne, J.-L., Brodeur, J., 2012. Using functional response modeling to investigate the effect of temperature on predator feeding rate and energetic efficiency. *Oecologia* 169, 1117–1125. <https://doi.org/10.1007/s00442-012-2255-6>
- Sep ulveda, F., Carrillo, R., 2007. Functional response of the predatory mite *Chiloseius camposi* (Acarina: Phytoseiidae) on densities of its prey, *Panonychus ulmi* (Acarina: Tetranychidae). *Revista de Biolog a Tropical* 56. <https://doi.org/10.15517/rbt.v56i3.5707>
- Sharifian, I., Sabahi, Q., Khoshabi, J., 2015. Functional response of *Macrolophus pygmaeus* (Rambur) and *Nesidiocoris tenuis* (Reuter) feeding on two different prey species. *Archives of Phytopathology and Plant Protection* 48, 910–920. <https://doi.org/10.1080/03235408.2016.1143579>
- Shipp, J.L., Whitfield, G.H., 1991. Functional Response of the Predatory Mite, *Amblyseius cucumeris* (Acari: Phytoseiidae), on Western Flower Thrips, *Frankliniella occidentalis* (Thysanoptera: Thripidae). *Environ Entomol* 20, 694–699. <https://doi.org/10.1093/ee/20.2.694>
- Shrestha, G., Enkegaard, A., 2013. The green lacewing, *Chrysoperla carnea*: Preference between lettuce aphids, *Nasonovia ribisnigri*, and western flower thrips, *Frankliniella occidentalis*. *J Insect Sci* 13. <https://doi.org/10.1673/031.013.9401>
- Shukla, A.N., Singh, R., Tripathi, C.P.M., 1990. Effect of predation period on the functional response of *Coccinella septempunctata* Linn. (Coleoptera: Coccinellidae), a predator of *Lipaphis erysimi* Kalt. (Homoptera: Aphididae). *Journal of Advanced Zoology* 11, 27–32.
- Siddiqui, A., Omkar, D., Paul, S.C., Mishra, G., 2015. Predatory responses of selected lines of developmental variants of ladybird, *Propylea dissecta* (Coleoptera: Coccinellidae) in relation to increasing prey and predator densities. *Biocontrol Science and Technology* 25, 992–1010. <https://doi.org/10.1080/09583157.2015.1024101>
- Sing, S.E., Arbogast, R.T., 2008. Predatory response of *Xylocoris flavipes* to bruchid pests of stored food legumes. *Entomologia Experimentalis Et Applicata*. 126: 107-114.
- Skirvin, D.J., Fenlon, J.S., 2001. Plant species modifies the functional response of *Phytoseiulus persimilis* (Acari: Phytoseiidae) to *Tetranychus urticae* (Acari: Tetranychidae): implications for biological control. *Bull. Entomol. Res.* 91, 61–67.
- Smith, R.B., 1984. Aspects of the feeding ecology of the garden cross-spider, *Araneus diadematus* Clerck. University of British Columbia. <https://doi.org/10.14288/1.0096174>
- Sohrabi, F., Shishehbor, P., 2007. Functional and numerical responses of *Stethorus gilvifrons* Mulsant feeding on strawberry spider mite, *Tetranychus turkestanii* Ugarov and Nikolski. *Pak. J. Biol. Sci.* 10, 4563–4566.

- Sokolow, S.H., Lafferty, K.D., Kuris, A.M., 2014. Regulation of laboratory populations of snails (*Biomphalaria* and *Bulinus* spp.) by river prawns, *Macrobrachium* spp. (Decapoda, Palaemonidae): Implications for control of schistosomiasis. *Acta Tropica* 132, 64–74. <https://doi.org/10.1016/j.actatropica.2013.12.013>
- Soluk, D.A., 1993. Multiple Predator Effects: Predicting Combined Functional Response of Stream Fish and Invertebrate Predators. *Ecology* 74, 219–225. <https://doi.org/10.2307/1939516>
- Song, Z.-W., Zheng, Y., Zhang, B.-X., Li, D.-S., 2016. Prey consumption and functional response of *Neoseiulus californicus* and *Neoseiulus longispinosus* (Acari: Phytoseiidae) on *Tetranychus urticae* and *Tetranychus kanzawai* (Acari: Tetranychidae). *Systematic and Applied Acarology* 21, 936–946. <https://doi.org/10.11158/saa.21.7.7>
- Sørnes, T.A., Aksnes, D.L., 2004. Predation efficiency in visual and tactile zooplanktivores. *Limnology and Oceanography* 49, 69–75. <https://doi.org/10.4319/lo.2004.49.1.0069>
- Spitze, K., 1985. Functional Response of an Ambush Predator: *Chaoborus americanus* Predation on *Daphnia pulex*. *Ecology* 66, 938–949. <https://doi.org/10.2307/1940556>
- Springett, B.P., Matthiessen, J.N., 1975. Predation on Potato Moth, *Phthorimaea operculella* (Lepidoptera: Gelechiidae), by the Western Silvereye, *Zosterops gouldi* (Aves: Zosteropidae). *Aust. J. Zool.* 23, 65–70. <https://doi.org/10.1071/zo9750065>
- Starkweather, P.L., Gilbert, J.J., 1977. Feeding in the Rotifer *Brachionus calyciflorus*. II. Effect of Food Density on Feeding Rates Using *Euglena gracilis* and *Rhodotorula glutinis*. *Oecologia* 28, 133–139.
- Stavrínides, M.C., Skirvin, D.J., 2003. The effect of chrysanthemum leaf trichome density and prey spatial distribution on predation of *Tetranychus urticae* (Acari: Tetranychidae) by *Phytoseiulus persimilis* (Acari: Phytoseiidae). *Bull. Entomol. Res.* 93, 343–350.
- Stewart, C.D., Braman, S.K., Pendley, A.F., 2002. Functional Response of the Azalea Plant Bug (Heteroptera: Miridae) and a Green Lacewing *Chrysoperla rufilabris* (Neuroptera: Chrysopidae), Two Predators of the Azalea Lace Bug (Heteroptera: Tingidae). *Environ Entomol* 31, 1184–1190. <https://doi.org/10.1603/0046-225X-31.6.1184>
- Stillman, R.A., Simmons, V.L., 2006. Predicting the functional response of a farmland bird. *Functional Ecology* 20, 723–730. <https://doi.org/10.1111/j.1365-2435.2006.01155.x>
- Sueldo, M.R., Bruzzone, O.A., Virla, E.G., 2010. Characterization of the earwig, *Doru lineare*, as a predator of larvae of the fall armyworm, *Spodoptera frugiperda*: A functional response study. *J Insect Sci* 10. <https://doi.org/10.1673/031.010.3801>
- Sundell, J., Norrdahl, K., Korpimäki, E., Hanski, I., 2000. Functional Response of the Least Weasel, *Mustela nivalis nivalis*. *Oikos* 90, 501–508.
- Taylor, A.D., 1988. Host Effects on Functional and Ovipositional Responses of *Bracon hebetor*. *Journal of Animal Ecology* 57, 173–184. <https://doi.org/10.2307/4771>
- Taylor, D.L., Collie, J.S., 2003. Effect of temperature on the functional response and foraging behavior of the sand shrimp *Crangon septemspinosa* preying on juvenile winter flounder *Pseudopleuronectes americanus*. *Marine Ecology Progress Series* 263, 217–234. <https://doi.org/10.3354/meps263217>
- Tellez, M.D.M., Tapia, G., Gamez, M., Cabello, T., Emden, H.F. van, 2013. Predation of *Bradysia* sp. (Diptera: Sciaridae), *Liriomyza trifolii* (Diptera: Agromyzidae) and *Bemisia tabaci* (Hemiptera: Aleyrodidae) by *Coenosia attenuata* (Diptera: Muscidae) in greenhouse crops. *EJE* 106, 199–204. <https://doi.org/10.14411/eje.2009.025>
- Tenhuberg, B., 1995. Estimating Predatory Efficiency of *Episyrphus balteatus* (Diptera: Syrphidae) in Cereal Fields. *Environ Entomol* 24, 687–691. <https://doi.org/10.1093/ee/24.3.687>

- Thompson, D.J., 1978. Towards a Realistic Predator-Prey Model: The Effect of Temperature on the Functional Response and Life History of Larvae of the Damselfly, *Ischnura elegans*. *Journal of Animal Ecology* 47, 757–767. <https://doi.org/10.2307/3669>
- Thompson, D.J., 1975. Towards a Predator-Prey Model Incorporating Age Structure: The Effects of Predator and Prey Size on the Predation of *Daphnia magna* by *Ischnura elegans*. *Journal of Animal Ecology* 44, 907–916. <https://doi.org/10.2307/3727>
- Thor, P., Wendt, I., 2010. Functional response of carbon absorption efficiency in the pelagic calanoid copepod *Acartia tonsa*. *Limnology and Oceanography* 55, 1779–1789. <https://doi.org/10.4319/lo.2010.55.4.1779>
- Timms, J.E., Oliver, T.H., Straw, N.A., Leather, S.R., 2008. The effects of host plant on the coccinellid functional response: Is the conifer specialist *Aphidecta oblitterata* (L.) (Coleoptera: Coccinellidae) better adapted to spruce than the generalist *Adalia bipunctata* (L.) (Coleoptera: Coccinellidae)? *Biological Control* 47, 273–281. <https://doi.org/10.1016/j.biocontrol.2008.08.009>
- Tirelli, V., Mayzaud, P., 2005. Relationship between functional response and gut transit time in the calanoid copepod *Acartia clausi*: role of food quantity and quality. *J Plankton Res* 27, 557–568. <https://doi.org/10.1093/plankt/fbi031>
- Titelman, J., Gandon, L., Goarant, A., Nilsen, T., 2007. Intraguild predatory interactions between the jellyfish *Cyanea capillata* and *Aurelia aurita*. *Mar Biol* 152, 745–756. <https://doi.org/10.1007/s00227-007-0721-1>
- Titelman, J., Hansson, L.J., 2006. Feeding rates of the jellyfish *Aurelia aurita* on fish larvae. *Marine Biology* 149, 297–306. <https://doi.org/10.1007/s00227-005-0200-5>
- Toscano, B.J., Newsome, B., Griffen, B.D., 2014. Parasite modification of predator functional response. *Oecologia* 175, 345–352. <https://doi.org/10.1007/s00442-014-2905-y>
- Townsend, C.R., Risebrow, A.J., 1982. The influence of light level on the functional response of a zooplanktonivorous fish. *Oecologia* 53, 293–295. <https://doi.org/10.1007/BF00389002>
- Trichilo, P.J., Leigh, T.F., 1986. Predation on Spider Mite Eggs by the Western Flower Thrips, *Frankliniella occidentalis* (Thysanoptera: Thripidae), an Opportunist in a Cotton Agroecosystem. *Environ Entomol* 15, 821–825. <https://doi.org/10.1093/ee/15.4.821>
- Tully, T., Cassey, P., Ferrière, R., 2005. Functional response: rigorous estimation and sensitivity to genetic variation in prey. *Oikos* 111, 479–487. <https://doi.org/10.1111/j.1600-0706.2005.14062.x>
- Turnbull, A.L., 1962. Quantitative Studies of the Food of *Linyphia triangularis* Clerck (Araneae: Linyphiidae). *The Canadian Entomologist* 94, 1233–1249. <https://doi.org/10.4039/Ent941233-12>
- Twardochleb, L.A., Novak, M., Moore, J.W., 2012. Using the functional response of a consumer to predict biotic resistance to invasive prey. *Ecological Applications* 22, 1162–1171. <https://doi.org/10.1890/11-0871.1>
- Uiterwaal, S.F., DeLong, J.P., 2018. Multiple factors, including arena size, shape the functional responses of ladybird beetles. *Journal of Applied Ecology* 55, 2429–2438. <https://doi.org/10.1111/1365-2664.13159>
- Uiterwaal, S.F., Mares, C., DeLong, J.P., 2017. Body size, body size ratio, and prey type influence the functional response of damselfly nymphs. *Oecologia* 185, 339–346. <https://doi.org/10.1007/s00442-017-3963-8>
- Uye, S., 1986. Impact of copepod grazing on the red-tide flagellate *Chattonella antiqua*. *Marine Biology* 92, 35–43. <https://doi.org/10.1007/BF00392743>
- van den Bosch, F., Santer, B., 1993. Cannibalism in *Cyclops abyssorum*. *Oikos* 67, 19–28. <https://doi.org/10.2307/3545091>
- van der Veer, H.W., Bergman, M.J.N., 1987. Predation by crustaceans on a newly settled 0-group plaice *Pleuronectes platessa* population in the western Wadden Sea. *Marine Ecology Progress Series* 35, 203–215.



- van Lenteren, J.C., Hemerik, L., Lins, J.C., Bueno, V.H.P., 2016. Functional Responses of Three Neotropical Mirid Predators to Eggs of *Tuta absoluta* on Tomato. *Insects* 7. <https://doi.org/10.3390/insects7030034>
- Veeravel, R., Baskaran, P., 1997. Functional and Numerical Responses of *Coccinella transversalis* Fab. and *Cheilomenes sexmaculatus* Fab. Feeding on the Melon Aphid, *Aphis gossypii* Glov. *International Journal of Tropical Insect Science* 17, 335–339. <https://doi.org/10.1017/S1742758400019159>
- Vega, M.P.A., 1997. The functional response of copepodid stages to adult of *Parabroteas sarsi* (Copepoda, Calanoida). *Internationale Revue der gesamten Hydrobiologie und Hydrographie* 82, 95–105. <https://doi.org/10.1002/iroh.19970820112>
- Verity, P.G., 1991. Measurement and simulation of prey uptake by marine planktonic ciliates fed plastidic and aplastidic nanoplankton. *Limnology and Oceanography* 36, 729–750. <https://doi.org/10.4319/lo.1991.36.4.0729>
- Vinyard, G.L., Menger, R.A., 1980. *Chaoborus americanus* predation on various zooplankters; Functional response and behavioral observations. *Oecologia* 45, 90–93. <https://doi.org/10.1007/BF00346712>
- Vollset, K.W., Bailey, K.M., 2011. Interplay of individual interactions and turbidity affects the functional response of three-spined sticklebacks *Gasterosteus aculeatus*. *Journal of Fish Biology* 78, 1954–1964. <https://doi.org/10.1111/j.1095-8649.2011.02963.x>
- Von Westernhagen, H., Rosenthal, H., 1976. Predator-Prey Relationship Between Pacific Herring, *Clupea harengus pallasii*, Larvae and a Predatory Hyperiid Amphipod, *Hyperoche medusarum*. *Fishery Bulletin* 74, 669–674.
- Vucetich, J.A., Peterson, R.O., Schaefer, C.L., 2002. The Effect of Prey and Predator Densities on Wolf Predation. *Ecology* 83, 3003–3013. [https://doi.org/10.1890/0012-9658\(2002\)083\[3003:TEOPAP\]2.0.CO;2](https://doi.org/10.1890/0012-9658(2002)083[3003:TEOPAP]2.0.CO;2)
- Vucic-Pestic, O., Birkhofer, K., Rall, B.C., Scheu, S., Brose, U., 2010. Habitat structure and prey aggregation determine the functional response in a soil predator–prey interaction. *Pedobiologia* 53, 307–312. <https://doi.org/10.1016/j.pedobi.2010.02.003>
- Walker, S.E., Rypstra, A.L., 2002. Sexual dimorphism in trophic morphology and feeding behavior of wolf spiders (Araneae: Lycosidae) as a result of differences in reproductive roles. *Can. J. Zool.* 80, 679–688. <https://doi.org/10.1139/z02-037>
- Walker, S.E., Rypstra, A.L., 2001. Sexual Dimorphism in Functional Response and Trophic Morphology in *Rabidosa rabida* (Araneae: Lycosidae). *The American Midland Naturalist* 146, 161–170. [https://doi.org/10.1674/0003-0031\(2001\)146\[0161:SDIFRA\]2.0.CO;2](https://doi.org/10.1674/0003-0031(2001)146[0161:SDIFRA]2.0.CO;2)
- Ware, D.M., 1972. Predation by Rainbow Trout (*Salmo gairdneri*): the Influence of Hunger, Prey Density, and Prey Size. *J. Fish. Res. Bd. Can.* 29, 1193–1201. <https://doi.org/10.1139/f72-175>
- Wasserman, R.J., Alexander, M.E., Dalu, T., Ellender, B.R., Kaiser, H., Weyl, O.L.F., 2016a. Using functional responses to quantify interaction effects among predators. *Functional Ecology* 30, 1988–1998. <https://doi.org/10.1111/1365-2435.12682>
- Wasserman, R.J., Alexander, M.E., Weyl, O.L.F., Barrios-O’Neill, D., Froneman, P.W., Dalu, T., 2016b. Emergent effects of structural complexity and temperature on predator–prey interactions. *Ecosphere* 7, e01239. <https://doi.org/10.1002/ecs2.1239>
- Wei, Q., Walde, S.J., 1997. The functional response of *Typhlodromus pyri* to its prey, *Panonychus ulmi*: the effect of pollen. *Exp Appl Acarol* 21, 677–684. <https://doi.org/10.1023/A:1018460719344>
- Weisse, T., 2004. *Meseres corlissi*: a rare oligotrich ciliate adapted to warm water and temporary habitats. *Aquatic Microbial Ecology* 37, 75–83. <https://doi.org/10.3354/ame037075>

- Weisse, T., Frahm, A., 2002. Direct and indirect impact of two common rotifer species (*Keratella* spp.) on two abundant ciliate species (*Urotricha furcata*, *Balanion planctonicum*). *Freshwater Biology* 47, 53–64. <https://doi.org/10.1046/j.1365-2427.2002.00780.x>
- Weisse, T., Karstens, N., Meyer, V.C.L., Janke, L., Lettner, S., Teichgräber, K., 2001. Niche separation in common prostome freshwater ciliates: the effect of food and temperature. *Aquatic Microbial Ecology* 26, 167–179. <https://doi.org/10.3354/ame026167>
- Wellington, C.G., Mayer, C.M., Bossenbroek, J.M., Stroh, N.A., 2010. Effects of turbidity and prey density on the foraging success of age 0 year yellow perch *Perca flavescens*. *Journal of Fish Biology* 76, 1729–1741. <https://doi.org/10.1111/j.1095-8649.2010.02612.x>
- Wells, M.L., McPherson, R.M., 1999. Population Dynamics of Three Coccinellids in Flue-Cured Tobacco and Functional Response of *Hippodamia convergens* (Coleoptera: Coccinellidae) Feeding on Tobacco Aphids (Homoptera: Aphididae). *Environ Entomol* 28, 768–773. <https://doi.org/10.1093/ee/28.4.768>
- Wennhage, H., 2002. Vulnerability of newly settled plaice (*Pleuronectes platessa* L.) to predation: effects of habitat structure and predator functional response. *Journal of Experimental Marine Biology and Ecology* 269, 129–145. [https://doi.org/10.1016/S0022-0981\(02\)00005-9](https://doi.org/10.1016/S0022-0981(02)00005-9)
- Wickham, S.A., 1995. Cyclops predation on ciliates: species-specific differences and functional responses. *J Plankton Res* 17, 1633–1646. <https://doi.org/10.1093/plankt/17.8.1633>
- Wiedenmann, R.N., O’Neil, R.J., 1991. Laboratory Measurement of the Functional Response of *Podisus maculiventris* (Say) (Heteroptera: Pentatomidae). *Environ Entomol* 20, 610–614. <https://doi.org/10.1093/ee/20.2.610>
- Williamson, C.E., 1984. Laboratory and field experiments on the feeding ecology of the cyclopoid copepod, *Mesocyclops edax*. *Freshwater Biology* 14, 575–585. <https://doi.org/10.1111/j.1365-2427.1984.tb00177.x>
- Winkler, H., Orellana, C.P., 1992. Functional responses of five cyprinid species to planktonic prey. *Environ Biol Fish* 33, 53–62. <https://doi.org/10.1007/BF00002553>
- Witz, B.W., 1996. The Functional Response of *Cnemidophorus sexlineatus*: Laboratory versus Field Measurements. *Journal of Herpetology* 30, 498–506. <https://doi.org/10.2307/1565692>
- Wong, M.C., Barbeau, M.A., 2006. Rock crab predation of juvenile sea scallops: the functional response and its implications for bottom culture. *Aquacult Int* 14, 355–376. <https://doi.org/10.1007/s10499-005-9038-6>
- Wood, C.C., Hand, C.M., 1985. Food-searching behaviour of the common merganser (*Mergus merganser*) I: Functional responses to prey and predator density. *Can. J. Zool.* 63, 1260–1270. <https://doi.org/10.1139/z85-189>
- Wright, R.A., Crowder, L.B., Martin, T.H., 1993. The effects of predation on the survival and size-distribution of estuarine fishes: an experimental approach. *Environ Biol Fish* 36, 291–300. <https://doi.org/10.1007/BF00001725>
- Xiao, Y., Fadamiro, H.Y., 2010. Functional responses and prey-stage preferences of three species of predacious mites (Acari: Phytoseiidae) on citrus red mite, *Panonychus citri* (Acari: Tetranychidae). *Biological Control* 53, 345–352. <https://doi.org/10.1016/j.biocontrol.2010.03.001>
- Xue, Y., Bahlai, C.A., Frewin, A., Sears, M.K., Schaafsma, A.W., Hallett, R.H., 2009. Predation by *Coccinella septempunctata* and *Harmonia axyridis* (Coleoptera: Coccinellidae) on *Aphis glycines* (Homoptera: Aphididae). *Environmental Entomology* 38, 708–714. <https://doi.org/10.1603/022.038.0322>
- Yaşar, B., Ozger, S., 2005. Functional response of *Oenopia conglobata* (L.) (Coleoptera: Coccinellidae) on *Hyalopterus pruni* (Geoffroy) (Homoptera: Aphididae) in three different size arenas. *Turkiye Entomoloji Dergisi* 29, 91–99.

- Yaşar, B., Özger, Ş., 2005. Development, feeding and reproduction responses of *Adalia fasciatopunctata revelierei* (Mulsant) (Coleoptera: Coccinellidae) to *Hyalopterus pruni* (Geoffroy) (Homoptera: Aphididae). *J Pest Sci* 78, 199–203. <https://doi.org/10.1007/s10340-005-0089-2>
- Yen, J., 1991. Predatory feeding behavior of an Antarctic marine copepod, *Euchaeta antarctica*. *Polar Research* 10, 433–442. <https://doi.org/10.1111/j.1751-8369.1991.tb00664.x>
- Yen, J., 1987. Predation by a carnivorous marine copepod, *Euchaeta norvegica* Boeck, on eggs and larvae of the North Atlantic cod *Gadus morhua* L. *Journal of Experimental Marine Biology and Ecology* 112, 283–296. [https://doi.org/10.1016/0022-0981\(87\)90074-8](https://doi.org/10.1016/0022-0981(87)90074-8)
- Yoo, Y.D., Seong, K.A., Kim, H.S., Jeong, H.J., Yoon, E.Y., Park, J., Kim, J.I., Shin, W., Palenik, B., 2018a. Feeding and grazing impact by the bloom-forming euglenophyte *Eutreptiella eupharyngea* on marine eubacteria and cyanobacteria. *Harmful Algae* 73, 98–109. <https://doi.org/10.1016/j.hal.2018.02.003>
- Yoo, Y.D., Seong, K.A., Kim, J.S., Nam, S.W., Jeong, H.J., Rho, J.-R., Yih, W., Kim, H.S., 2018b. Mixotrophy in the sand-dwelling dinoflagellate *Thecadinium kofoidii*. *Marine Biology Research* 14, 165–172. <https://doi.org/10.1080/17451000.2017.1379604>
- Zarghami, S., Mossadegh, M.S., Kocheili, F., Allahyari, H., Rasekh, A., 2016. Functional Responses of *Nephus arcuatus* Kapur (Coleoptera: Coccinellidae), the Most Important Predator of Spherical Mealybug *Nipaecoccus viridis* (Newstead). *Psyche: A Journal of Entomology* 2016. <https://doi.org/10.1155/2016/9417496>
- Zhang, S.-C., Zhu, F., Zheng, X.-L., Lei, C.-L., Zhou, X.-M., 2013. Survival and developmental characteristics of the predatory bug *Orius similis* (Hemiptera: Anthocoridae) fed on *Tetranychus cinnabarinus* (Acari: Tetranychidae) at three constant temperatures. *EJE* 109, 503–508. <https://doi.org/10.14411/eje.2012.063>
- Zhang, Z.-Q., 1992. Functional response of *Allothrombium pulvinum* deutonymphs (Acari: Trombididae) on two-spotted spider mites (Acari: Tetranychidae). *Exp Appl Acarol* 15, 249–257. <https://doi.org/10.1007/BF01246566>

Figure 1. Flow diagram detailing the decisions for how to include and standardize functional response data from the literature.

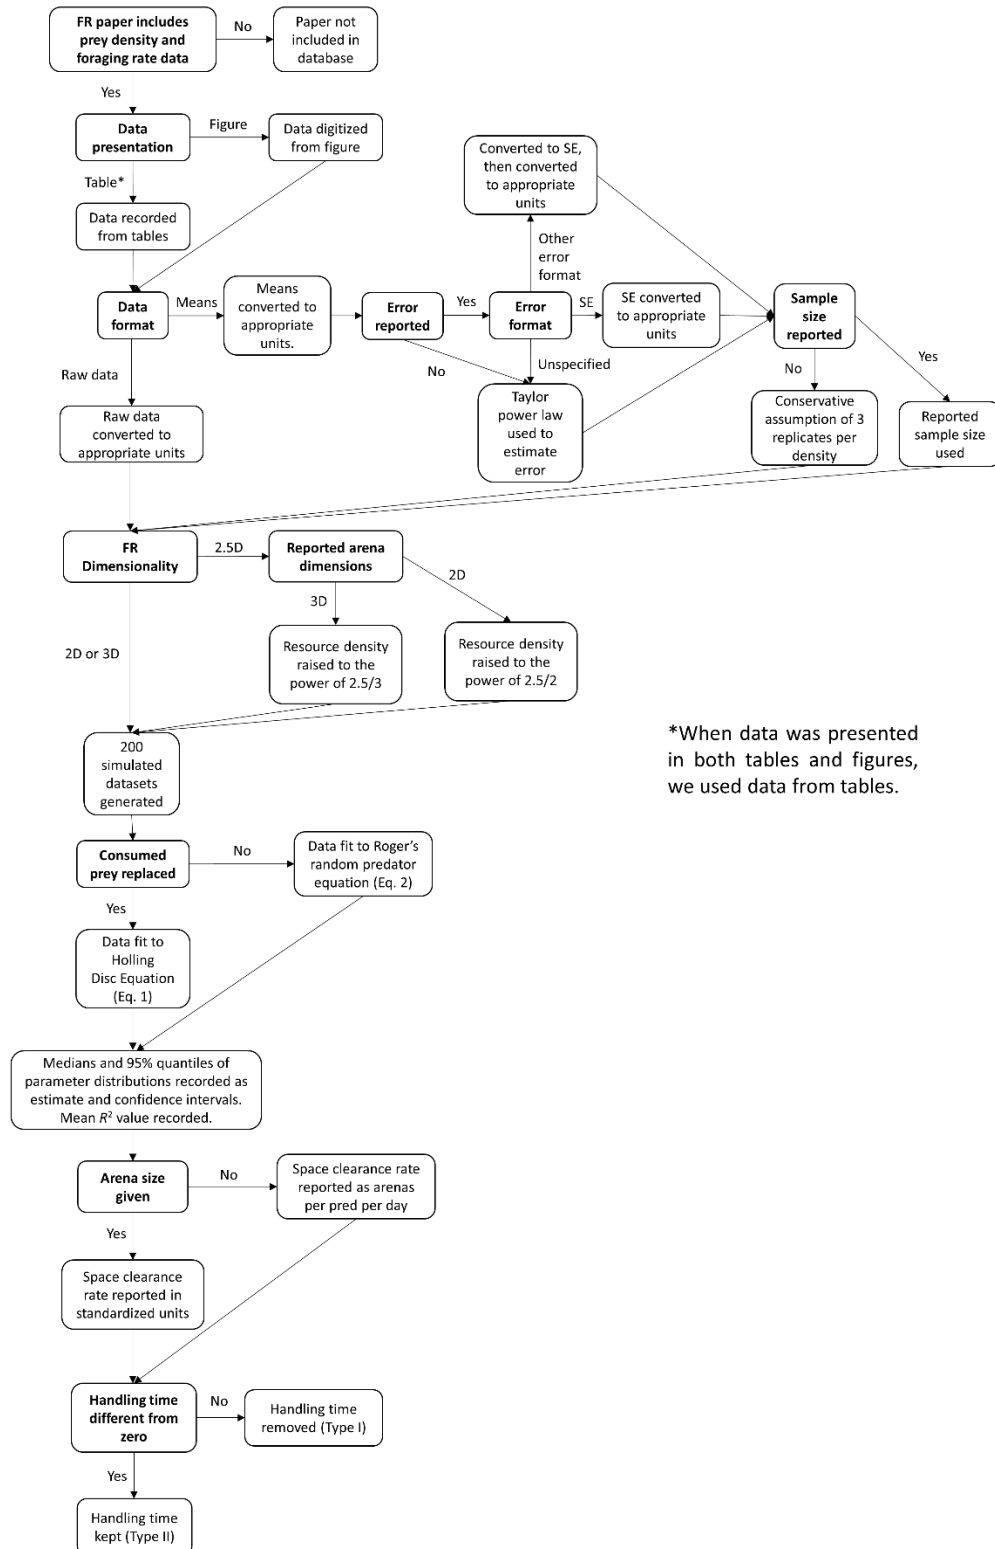

Figure 2. Taylor power law relationship between mean foraging rate and the standard error of the mean across all observations. This relationship was used to estimate the foraging rate standard error for studies where only the mean foraging rate at a resource level was given.

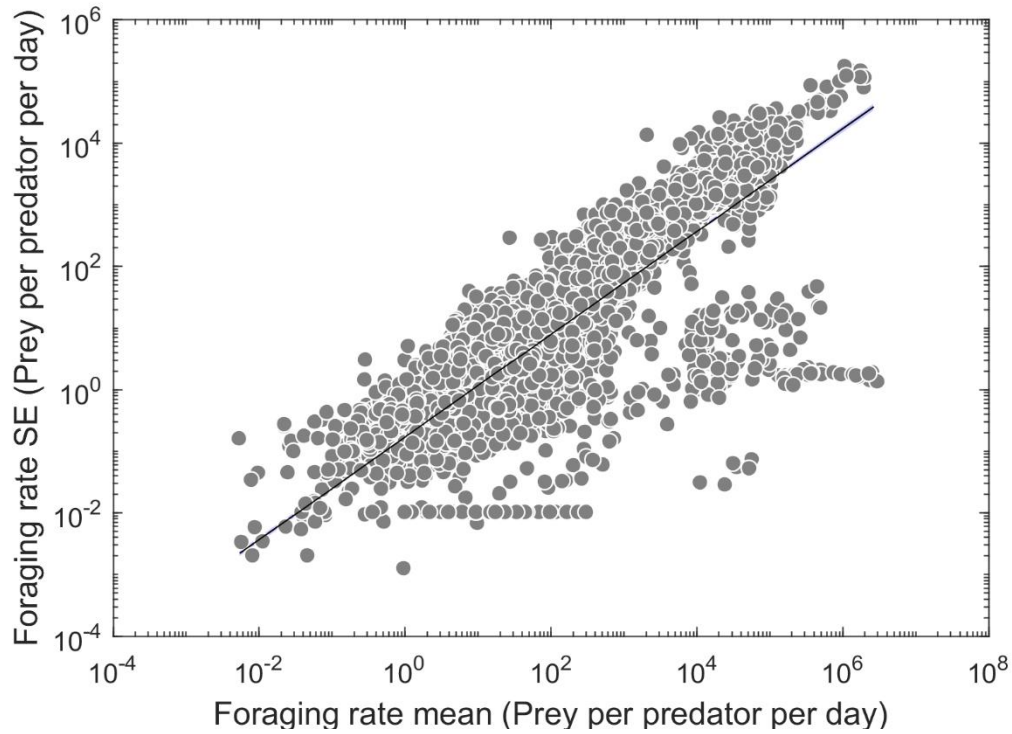

Figure 3. Flow diagram detailing the methods for obtaining body masses of consumers and resources represented in functional response data in the FoRAGE database.

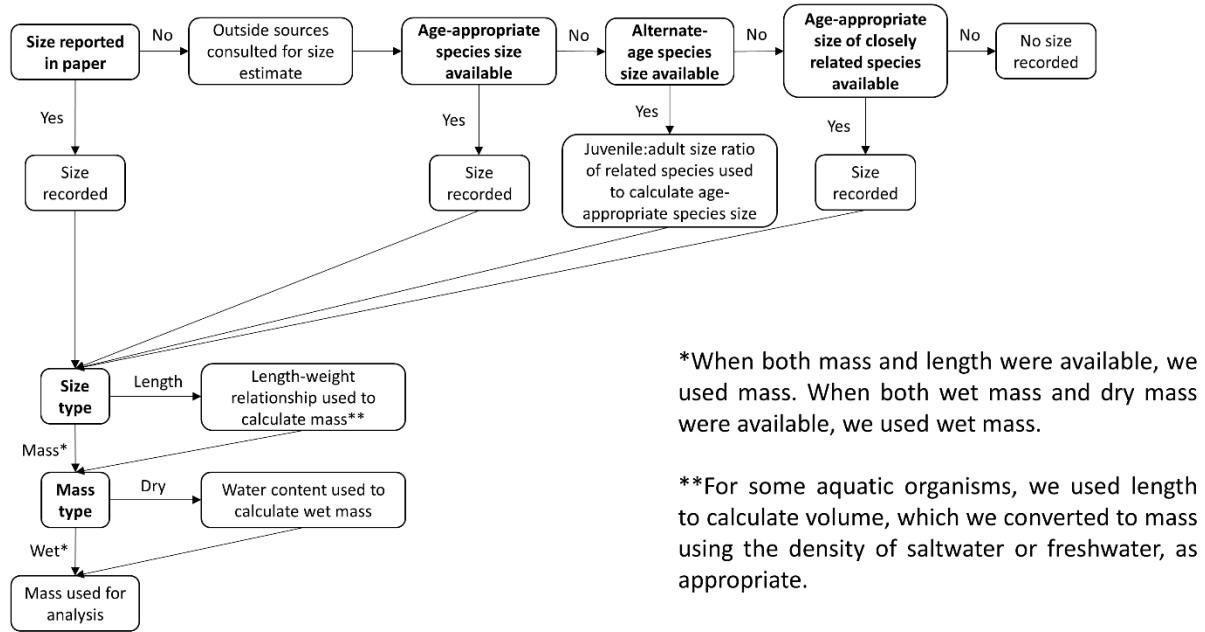

Figure 4. Pie charts showing the breakdown of functional responses in the FoRAGE database by A) habitat, B) foraging type, C) predator major grouping, and minor groupings within the major groupings, connected by lines, for D) invertebrates, E) protozoa, and F) vertebrates.

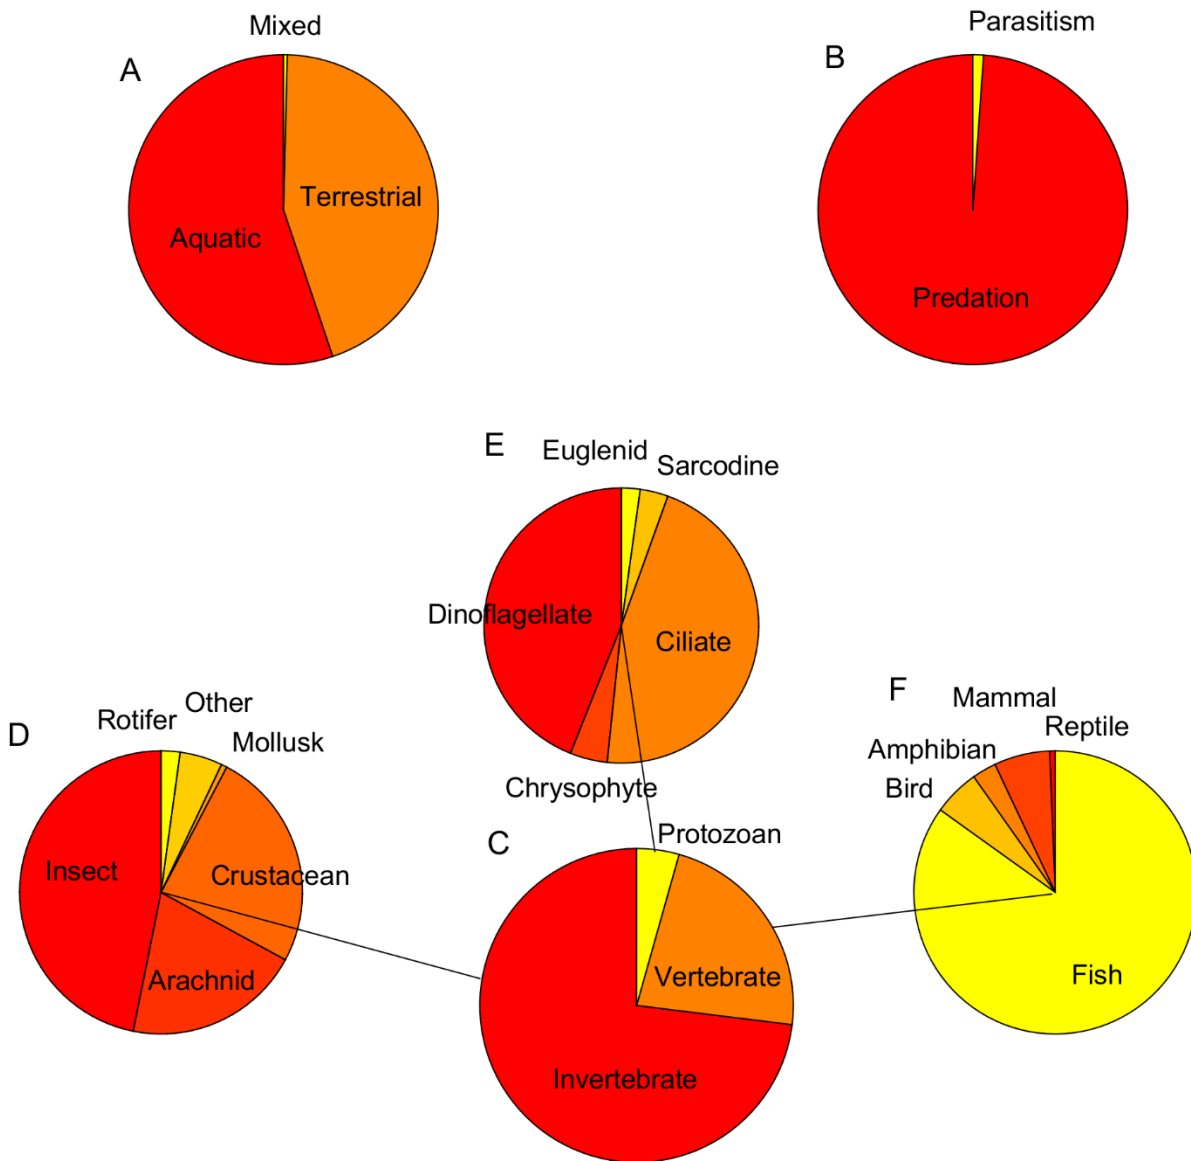

Appendix A: Publications containing original data on the functional responses in the FoRAGE database. Sources are grouped by Predator Major or Minor group.

| Predator major or minor group | Sources                                                                                                                                                                                                                                                                                                                                                                                                                                                                                                                                                                                                                                                                                                                                                                                                                                                                                                                                                                                                                                                                                                                                                                                                                                                                                                                                                                                                                                                                                                                                                                                                                                                                                                                                                                                                                                                                                                                                                                                                                                                                                                                                                                                                                                                                                                                                                                                                                                                                                                                                                                                                                                                                                                                                                                                                                                                                                                                                                                                                                                                                                          |
|-------------------------------|--------------------------------------------------------------------------------------------------------------------------------------------------------------------------------------------------------------------------------------------------------------------------------------------------------------------------------------------------------------------------------------------------------------------------------------------------------------------------------------------------------------------------------------------------------------------------------------------------------------------------------------------------------------------------------------------------------------------------------------------------------------------------------------------------------------------------------------------------------------------------------------------------------------------------------------------------------------------------------------------------------------------------------------------------------------------------------------------------------------------------------------------------------------------------------------------------------------------------------------------------------------------------------------------------------------------------------------------------------------------------------------------------------------------------------------------------------------------------------------------------------------------------------------------------------------------------------------------------------------------------------------------------------------------------------------------------------------------------------------------------------------------------------------------------------------------------------------------------------------------------------------------------------------------------------------------------------------------------------------------------------------------------------------------------------------------------------------------------------------------------------------------------------------------------------------------------------------------------------------------------------------------------------------------------------------------------------------------------------------------------------------------------------------------------------------------------------------------------------------------------------------------------------------------------------------------------------------------------------------------------------------------------------------------------------------------------------------------------------------------------------------------------------------------------------------------------------------------------------------------------------------------------------------------------------------------------------------------------------------------------------------------------------------------------------------------------------------------------|
| Insect                        | (Agarwala et al., 2001; Akre and Johnson, 1979; Anderson, 2016; Asante, 1995; Atlihan et al., 2010; Bailey, 1989; Ball et al., 2015; Barbosa et al., 2014; Cabral et al., 2009; Chang et al., 1993; Chenaux et al., 2011; Chesson, 1989; Chong and Oetting, 2006; Chow et al., 1983; Claver et al., 2003; Coll and Ridgway, 1995; Cothran and Thorp, 1985; Crowley and Martin, 1989; De Clercq et al., 1998, 2000; Ding-Xu et al., 2007; Dinis et al., 2016; Donnelly and Phillips, 2001; El-Basha et al., 2012; Elliott, 2003, 2003; Enkegaard et al., 2001; Farahani and Goldansaz, 2013; Farhadi et al., 2010; Faria et al., 2004; Farrokhi et al., 2010; Flinn, 1991; Foglar et al., 1990; Folsom and Collins, 1984; Fox and Murdoch, 1978; Frewin et al., 2010; Gergs et al., 2010; Gergs and Ratte, 2009; Gilioli et al., 2005; Gitonga et al., 2002; Gotoh et al., 2004; Gresens et al., 1982; Gupta et al., 2012; Hassanpour et al., 2011; Hassell, 1971; Hassell et al., 1977, 1977; He et al., 2012; Heidarian et al., 2012; Heimpel and Hough-Goldstein, 1994; Hildrew and Townsend, 1977; Holling, 1965; Hossie and Murray, 2010; Hunt and Swift, 2010; Isenhour and Yeargan, 1981; İşikber, 2005; Jeschke and Tollrian, 2005; Jones et al., 2007; Kalsi et al., 2014; Khan, 2009; Khan et al., 2016; Kharboutli and Mack, 1993; Koch et al., 2003; Krishnaraj and Pritchard, 1995; Kumar et al., 2014; LeCato, 1978; LeCato and Arbogast, 1979; Lee and Kang, 2004; Losey and Denno, 1998; Loughridge and Luff, 1983; Madadi et al., 2011; Mandour et al., 2006; Maselou et al., 2015; McCaffrey and Horsburgh, 1986; McCoull et al., 1998; McCoy et al., 2011; Messina and Hanks, 1998; Mills and Lacan, 2004; Moayeri et al., 2013; Mohaghegh et al., 2001; Mondal et al., 2014; Montserrat et al., 2000; Moore, 1988; Morales and Burandt, 1985; Mrosso et al., 2013; Munyaneza and Obrycki, 1997; Murdie and Hassell, 1973; Nachappa et al., 2006; Nagai and Yano, 2000; Nordlund and Morrison, 1990; Ofuya and Akingbohunge, 1988; Opit et al., 1997; Papanikolaou et al., 2011; Parajulee et al., 1994, 2006; Pervez and Omkar, 2005; Queiroz et al., 2015; Rocha and Redaelli, 2004; Rohlf and Mack, 1984; Sabaghi et al., 2011; Sahayaraj et al., 2015; Sahayaraj and Ambrose, 1994; Saleh et al., 2010; Saljoqi et al., 2015, 2016; Sarmiento et al., 2007; Seko and Miura, 2008; Sentis et al., 2012, 2017; Sharifian et al., 2015; Shrestha and Enkegaard, 2013; Shukla et al., 1990; Siddiqui et al., 2015; Sing and Arbogast, 2008; Sohrabi and Shishehbor, 2007; Soluk, 1993; Spitze, 1985; Stewart et al., 2002; Sueldo et al., 2010; Taylor, 1988; Tellez et al., 2013; Tenhumberg, 1995; Thompson, 1975, 1978; Timms et al., 2008; Trichilo and Leigh, 1986; Uiterwaal et al., 2017; van Lenteren et al., 2016; Veeravel and Baskaran, 1997; Vinyard and Menger, 1980; Wasserman et al., 2016b; Wells and McPherson, 1999; Wiedenmann and O'Neil, 1991; Xue et al., 2009; Yaşar and Ozger, 2005; Yaşar and Özger, 2005; Zarghami et al., 2016; Zhang et al., 2013) |



|                   |                                                                                                                                                                                                                                                                                                                                                                                                                                                                                                                                                                                                                                                                                                                                                                                                                                                                                                                                        |
|-------------------|----------------------------------------------------------------------------------------------------------------------------------------------------------------------------------------------------------------------------------------------------------------------------------------------------------------------------------------------------------------------------------------------------------------------------------------------------------------------------------------------------------------------------------------------------------------------------------------------------------------------------------------------------------------------------------------------------------------------------------------------------------------------------------------------------------------------------------------------------------------------------------------------------------------------------------------|
| Mite              | (Badii et al., 2004; Carrillo and Peña, 2012; Castagnoli and Simoni, 1999; Cédola et al., 2001; Chant, 1961; Everson, 1979; Fan and Petitt, 1994; Fantinou et al., 2012; Farazmand et al., 2012; Ferla et al., 2011; Fernando and Hassell, 1980; Gotoh et al., 2004; Hardman and Rogers, 1991; Hauzy et al., 2010; Hoque et al., 2010; Jafari et al., 2012; Kasap and Atlihan, 2011; Koveos and Broufas, 2000; Kustutan and Cakmak, 2009; Laing and Osborn, 1974; Madadi et al., 2007; Midthassel et al., 2014; Nwilene and Nachman, 1996; Poletti et al., 2007; Sandness and McMurtry, 1970; Seiedy et al., 2012; Sepúlveda and Carrillo, 2007; Shipp and Whitfield, 1991; Skirvin and Fenlon, 2001; Stavrinides and Skirvin, 2003; Wei and Walde, 1997; Xiao and Fadamiro, 2010; Zhang, 1992)                                                                                                                                        |
| Cladoceran        | (Burns and Rigler, 1967; DeMott, 1982; Lampert, 1994; McMahon and Rigler, 1965; Paulsson, n.d.; Pichlová and Vijverberg, 2001; Porter et al., 1982; Rigler, 1961; Ryther, 1954; Sarnelle and Wilson, 2008)                                                                                                                                                                                                                                                                                                                                                                                                                                                                                                                                                                                                                                                                                                                             |
| Other Crustaceans | (Alexander et al., 2012, 2013a, 2013b; Aljetlawi et al., 2004; Andresen and van der Meer, 2010; Barrios-O'Neill et al., 2014; Bergström and Englund, 2004; Bollache et al., 2008; Bovy et al., 2015; Chigbu and Sibley, 1994; Daly and Long, 2014; DeBlois and Leggett, 1991; Dick et al., 2013; Dumont et al., 1994; Eggleston et al., 1992; Eggleston, 1990a, 1990b, 1990c; Fitzsimons et al., 2006; Gonçalves et al., 2016; Griffen and Delaney, 2007; Haddaway et al., 2012; Iribarne et al., 1995; Laverty et al., 2015; Long et al., 2012; Long and Whitefleet-Smith, 2013; MacNeil et al., 2013; Moksnes et al., 1997; Pollack et al., 2008; Prokopenko et al., 2017; Rindone and Eggleston, 2011; Sandberg, 1997; Sokolow et al., 2014; Taylor and Collie, 2003; Toscano et al., 2014; Twardochleb et al., 2012; van der Veer and Bergman, 1987; Von Westernhagen and Rosenthal, 1976; Wennhage, 2002; Wong and Barbeau, 2006) |
| Reptile           | (Dor et al., 2014; Witz, 1996)                                                                                                                                                                                                                                                                                                                                                                                                                                                                                                                                                                                                                                                                                                                                                                                                                                                                                                         |
| Mammal            | (Dale et al., 1994; Gilg et al., 2006; Holling, 1959b, 1965; Messier, 1994; Nilsen et al., 2009; O'Donoghue et al., 1998; Quinn et al., 2003; Sundell et al., 2000; Vucetich et al., 2002)                                                                                                                                                                                                                                                                                                                                                                                                                                                                                                                                                                                                                                                                                                                                             |
| Mollusk           | (Geange and Stier, 2010; Katz, 1985; Kushner and Hovel, 2006; Márquez et al., 2007a, 2007b)                                                                                                                                                                                                                                                                                                                                                                                                                                                                                                                                                                                                                                                                                                                                                                                                                                            |
| Amphibian         | (Anderson et al., 2016; Ranta and Nuutinen, 1985)                                                                                                                                                                                                                                                                                                                                                                                                                                                                                                                                                                                                                                                                                                                                                                                                                                                                                      |
| Spider            | (Bressendorff and Toft, 2011; Denno et al., 2004, 2003; Finke and Denno, 2002; Hardman and Turnbull, 1980, 1974; Heong et al., 1991; Khan, 2013, 2012; Líznavá and Pekár, 2013; Lyon et al., 2018; Mansour and Heimbach, 1993; Michalko and Pekár, 2017; Monzó et al., 2009; Palanichamy, 1983; Pekár, 2005; Pekár et al., 2015; Provencher and Coderre, 1987; Řezáč et al., 2010; Rossi et al., 2006; Samu and Biro, 2013; Schmidt et al., 2014; Smith, 1984; Song et al., 2016; Tully et al., 2005; Turnbull, 1962; Vucic-Pestic et al., 2010; Walker and Rypstra, 2002, 2001)                                                                                                                                                                                                                                                                                                                                                       |
| Copepod           | (Almeda et al., 2010; Brandl, 1998; Colin and Dam, 2007; Confer, 1971; Enriquez-Garcia et al., 2013; Frost, 1972; Garrido et al., 2013; Hada and Uye, 1991; Hansen et al., 1990; Helenius and Saiz, 2017; Hooff and Bollens, 2004; Houde and Roman, 1987; Isari and Saiz, 2011; Jeong et al.,                                                                                                                                                                                                                                                                                                                                                                                                                                                                                                                                                                                                                                          |

|                 |                                                                                                                                                                                                                                                                                                                                                                                                                                                                                                                                                                                                                                                                                                                                                                                                                                                                                                                                                                                                                                                                                                                                                                                                                                                                                                                                 |
|-----------------|---------------------------------------------------------------------------------------------------------------------------------------------------------------------------------------------------------------------------------------------------------------------------------------------------------------------------------------------------------------------------------------------------------------------------------------------------------------------------------------------------------------------------------------------------------------------------------------------------------------------------------------------------------------------------------------------------------------------------------------------------------------------------------------------------------------------------------------------------------------------------------------------------------------------------------------------------------------------------------------------------------------------------------------------------------------------------------------------------------------------------------------------------------------------------------------------------------------------------------------------------------------------------------------------------------------------------------|
|                 | 2007b; Krylov, 1988; Kumar and Rao, 2003; Lampitt, 1978; López-Urrutia et al., 2004; McQueen, 1969; Morozov et al., 2008; Muschiol et al., 2008a, 2008b; Nejtgaard et al., 1995; Novich et al., 2014; Olsen et al., 2000; Plaßmann et al., 1997; Rabette et al., 1998; Roche, 1990; Saage et al., 2009; Saiz and Kiørboe, 1995; Sarma et al., 2013; Sell et al., 2001; Thor and Wendt, 2010; Tirelli and Mayzaud, 2005; Uye, 1986; van den Bosch and Santer, 1993; Vega, 1997; Wickham, 1995; Williamson, 1984; Yen, 1987, 1991)                                                                                                                                                                                                                                                                                                                                                                                                                                                                                                                                                                                                                                                                                                                                                                                                |
| Rotifer         | (Iyer and Rao, 1996; Korstad et al., 1989; Nandini and Sarma, 1999; Rothhaupt, 1990; Starkweather and Gilbert, 1977; Weisse and Frahm, 2002)                                                                                                                                                                                                                                                                                                                                                                                                                                                                                                                                                                                                                                                                                                                                                                                                                                                                                                                                                                                                                                                                                                                                                                                    |
| Fish            | (Alanis et al., 2009; Alexander et al., 2014, 2015; Anderson et al., 1978; Anderson, 2001; Barnhisel and Kerfoot, 2004; Barrios-O'Neill et al., 2014; Bergman, 1987, 1988; Bryan et al., 1995; Buckel and Stoner, 2000; Cowan et al., 2016; Czesny et al., 2001; de Figueiredo et al., 2007; de Villemereuil and López-Sepulcre, 2011; Fitzsimons et al., 2006; Galarowicz and Wahl, 2005; Gibson and Ezzi, 1992; Gulbrandsen, 1991; Gustafsson et al., 2010; Harborne, 2012; Hedgespeth et al., 2014; Hjelm and Johansson, 2003; Houde and Schekter, 1980; Hyatt, 1980; Johansson and Leonardsson, 1998; Johansson, 1987; Johnson, 2006; Koski and Johnson, 2002; Kroetz and Powers, 2015; Letcher et al., 1997; Ljunggren and Sandström, 2007; Miller et al., 1992; Morales-Ventura et al., 2004; Moss and Beauchamp, 2007; Moustahfid et al., 2010, 2010; Munk, 1995; Munk and Kiørboe, 1985; Murdoch et al., 1975; Murray et al., 2013, 2016; O'Brien et al., 2001; Ohlberger et al., 2008; Oyugi et al., 2012; Persson, 1986; Persson and Greenberg, 1990; Ryer et al., 2002; Sandheinrich and Atchison, 1989; Soluk, 1993; Sørnes and Aksnes, 2004; Townsend and Risebrow, 1982; Vollset and Bailey, 2011; Ware, 1972; Wasserman et al., 2016a; Wellington et al., 2010; Winkler and Orellana, 1992; Wright et al., 1993) |
| Ctenophora      | (Båmstedt, 1998; Buecher and Gasser, 1998; Greene et al., 1986; Jaspers et al., 2011; Kremer et al., 1986; Monteleone and Duguay, 1988; Reeve et al., 1978; Sørnes and Aksnes, 2004)                                                                                                                                                                                                                                                                                                                                                                                                                                                                                                                                                                                                                                                                                                                                                                                                                                                                                                                                                                                                                                                                                                                                            |
| Cnidarea        | (Bailey and Batty, 1983; Båmstedt, 1990; Båmstedt et al., 1994; Lafontaine and Leggett, 1988, 1987; Morand et al., 1987; Titelman et al., 2007; Titelman and Hansson, 2006)                                                                                                                                                                                                                                                                                                                                                                                                                                                                                                                                                                                                                                                                                                                                                                                                                                                                                                                                                                                                                                                                                                                                                     |
| Bird            | (Fritz et al., 2001; Gilg et al., 2006; Korpimäki and Norrdahl, 1991; Nielsen, 1999; Redpath and Thirgood, 1999; Springett and Matthiessen, 1975; Stillman and Simmons, 2006; Wood and Hand, 1985)                                                                                                                                                                                                                                                                                                                                                                                                                                                                                                                                                                                                                                                                                                                                                                                                                                                                                                                                                                                                                                                                                                                              |
| Tardigrade      | (Hohberg and Traunspurger, 2005)                                                                                                                                                                                                                                                                                                                                                                                                                                                                                                                                                                                                                                                                                                                                                                                                                                                                                                                                                                                                                                                                                                                                                                                                                                                                                                |
| Platyhelminthes | (Beier et al., 2004; Hammill et al., 2010; Kratina et al., 2007)                                                                                                                                                                                                                                                                                                                                                                                                                                                                                                                                                                                                                                                                                                                                                                                                                                                                                                                                                                                                                                                                                                                                                                                                                                                                |
| Chromista       | (Hansen and Nielsen, 1997)                                                                                                                                                                                                                                                                                                                                                                                                                                                                                                                                                                                                                                                                                                                                                                                                                                                                                                                                                                                                                                                                                                                                                                                                                                                                                                      |
| Protozoa        | (Buskey et al., 1994; Frangópulos et al., 2011; Gismervik, 2005; Hansen, 1992; Hewett, 1980; Jacobson and Anderson, 1993; Jakobsen and Hansen, 1997; Jeong et al., 1999; Hae Jin Jeong et al., 2001; H. J. Jeong et al., 2001; Jeong et al., 2002, 2004, 2007b, 2007a, 2007c, 2011, 2018a, 2018b; Jeong and Latz, 1994; John and Davidson, 2001; Kamiyama, 1997; Kamiyama et al., 2005; Kim and Jeong, 2004; Kimmance et al., 2006; Kopp and Tollrian,                                                                                                                                                                                                                                                                                                                                                                                                                                                                                                                                                                                                                                                                                                                                                                                                                                                                          |

|       |                                                                                                                                                                                 |
|-------|---------------------------------------------------------------------------------------------------------------------------------------------------------------------------------|
|       | 2003; Laybourn, 1976; Lim et al., 2018; Lin et al., 2004; Müller and Schlegel, 1999; Rogerson, 1981; Verity, 1991; Weisse et al., 2001; Weisse, 2004; Yoo et al., 2018a, 2018b) |
| Plant | (Englund and Harms, 2001)                                                                                                                                                       |
